## 43 **1. Introduction**

44 Cellular junctions endow epithelial tissues with their barrier functions by physically  
45 connecting neighboring cells. Junction integrity is critical to prevent many diseases. While,  
46 among the various junction types, adherens junctions are typically considered as mechanical  
47 couplers between cells in epithelia, recent evidence also suggests an important mechanical  
48 role for tight junctions (TJs).<sup>[1-7]</sup> It is conceived that TJs provide a mechanical feedback  
49 system regulating the contractility of individual cells via the actomyosin cytoskeleton and  
50 their adhesion strength to neighboring cells.<sup>[1,4,8-11]</sup> Specifically, it was shown that TJs provide  
51 a negative mechanical feedback to individual cells in a layer, so that they contract less,  
52 lowering the forces on the adherens junctions.<sup>[1,4]</sup> Once TJ formation is inhibited, cells  
53 respond by building thick actomyosin rings at the cell periphery, which, upon contraction,  
54 lead to severe heterogeneity of the cell morphology, particularly visible at the apical  
55 side.<sup>[8,4,12,11]</sup> Since this mechanical TJ-based mechanism was established only recently,  
56 explicit knowledge of its implications for crucial biological processes such as collective  
57 migration remains limited. Collective cell migration depends on an intricate interplay of the  
58 mechanical interaction in a cell layer ranging from single cells, e.g., leader cells at the  
59 advancing migration front, to the collective behavior of the cell sheet on a mesoscopic  
60 level.<sup>[13-18]</sup> This interplay depends on the fine tuning of cell motility, density, contractility,  
61 and cell-cell adhesion.<sup>[19-31]</sup>

62

63 Important advances have been achieved in understanding how collective cell migration is  
64 generally influenced by the adhesion-mediating junction proteins.<sup>[27]</sup> However, there is  
65 controversial evidence on the influence of different TJ components on collective migration.  
66 While knockout of the transmembrane protein occludin has been shown to severely  
67 compromise migration dynamics,<sup>[32]</sup> interference with the scaffolding ZO (zonula occludens)  
68 proteins was associated with both migration acceleration (ZO2; Raya-Sandino et al.<sup>[33]</sup>, ZO1;

69 Bazellières et al.<sup>[27]</sup>) as well as deceleration (ZO1; Tornavaca et al.<sup>[5]</sup>, ZO3; Bazellières et  
70 al.<sup>[27]</sup>) in different epithelial cell lines. This discrepancy in evidence might be explained by the  
71 fact that such studies focused on the modification of only one single TJ component at a time.  
72 More recently, there were in-depth efforts to understand the impact of interfering with  
73 multiple ZO proteins on cell- and mechanobiology in general.<sup>[1,2,4]</sup> However, the  
74 consequences for collective cell migration remain elusive.

75

76 To close this gap in knowledge, we performed migration experiments with ZO1 KO (single  
77 knockout) as well as ZO1/2 dKD (double knockdown) MDCK II cell lines in combination  
78 with mechanical measurements and various imaging techniques. We showed that ZO protein  
79 loss severely diminishes migration speed and coherence. This was induced by cellular  
80 jamming, or liquid-to-solid-like transition, upon progressing migration due to uncontrolled  
81 proliferation, concomitant with actomyosin remodeling leading to pronounced changes of  
82 cellular mechanics. In particular, a coexistence of elevated small cells with strong actin rings  
83 at the periphery and large flat ones was one of the hallmarks explaining the altered collective  
84 migration. The enhanced proliferation is predominately observed for flat and strained cells  
85 originating most likely from tensile forces generated by the smaller but highly contractile cells  
86 and exerted on the adjacent larger cells. The increase in proliferation leads to jamming and  
87 eventually limits migration speed and reduces order parameters associated with collective  
88 migration.

89 ZO1 KO cells showed similar but less pronounced proliferational, mechanical, and  
90 cytoskeletal adaptations. Albeit they also exhibited signs of jamming at late migration stages,  
91 no distinct small and large cell phenotypes arose as found for dKD cells. This finding  
92 emphasizes that the coexistence of large cells, which proliferate more and induce crowding,  
93 and small cells, which migrate less actively, is an important feature of jamming in TJ-  
94 deficient cells.

## 95 **2. Results**

### 96 **2.1. ZO proteins ensure fast and coherent epithelial migration**

97 To investigate the role of TJs in collective migration, we first performed migration  
98 experiments using phase contrast microscopy combined with particle image velocimetry  
99 (PIV)-based analyses (**Figure 1A/B**).<sup>[34]</sup> Strikingly, video microscopy revealed that migration  
100 velocity of dKD cells was substantially lower than that of WT (wildtype) cells and even ZO1  
101 KO cells. We first summarized data from the overall migration dynamics of the whole cell  
102 layers by averaging over all time points and all vectors (Figure 1C). While ZO1 KO cells did  
103 not display significant changes in migration dynamics ( $16 \pm 2 \mu\text{m h}^{-1}$  (mean  $\pm$  s.d.)) compared  
104 with WT MDCK II ( $18 \pm 2 \mu\text{m h}^{-1}$  (mean  $\pm$  s.d.),  $p = 0.13$ ), ZO1/2 dKD cells migrated  
105 significantly slower ( $8 \pm 1 \mu\text{m h}^{-1}$  (mean  $\pm$  s.d.),  $p < 0.001$ ). Additionally, we calculated the  
106 order parameter, which quantifies how directed the local motion is towards the migration edge  
107 (Figure 1C). We found that dKD cells migrated less directed (order parameter of  $0.12 \pm 0.04$ )  
108 than WT ( $0.29 \pm 0.09$ ) and ZO1 KO ( $0.31 \pm 0.08$ ) cells ( $p < 0.001$ ), respectively.  
109

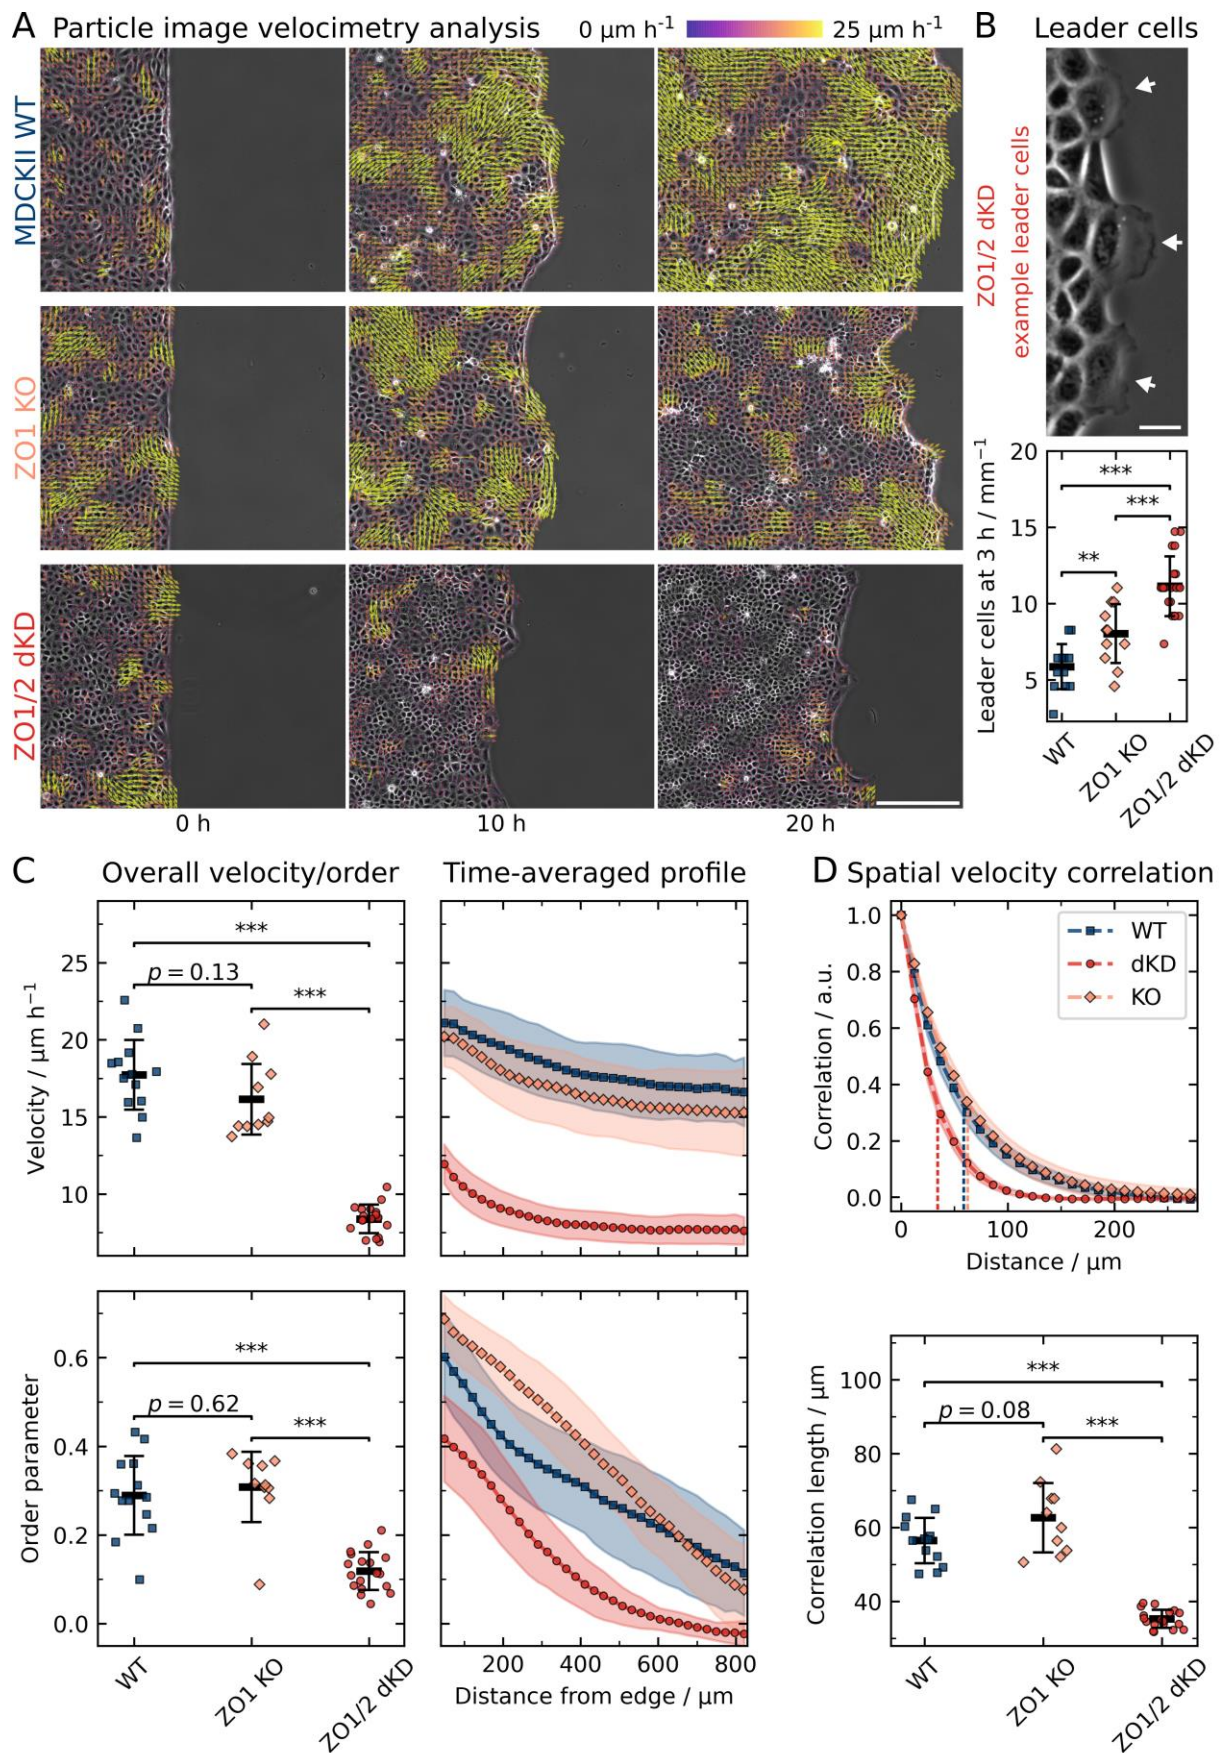

110 **Figure 1.** Collective cell migration dynamics of wild type (WT), ZO1 knockout (KO) and  
 111 ZO1/2 double knockdown (dKD) MDCK II cells. A) Migrating cell monolayers with the

112 corresponding velocity vectors obtained from particle image velocimetry (PIV). To enhance  
113 the figure's visibility, cropped images are shown (about a fourth of the original field of view).  
114 Scale bar: 200  $\mu\text{m}$ . B) Quantification of leader cell emergence and a corresponding dKD  
115 example. The amount of leader cells was normalized by the respective migration edge length  
116 for better comparison. Scale bar: 25  $\mu\text{m}$ . C) The overall velocity and order are defined as the  
117 average over all vectors and time points, velocity and order were additionally averaged over  
118 time along the distance from the edge of the cell layer. D) Spatial velocity function. Vertical  
119 dashed lines indicate the corresponding characteristic correlation lengths below. All data are  
120 shown as means and standard deviations. Sample sizes (independent experiments): 13 (WT),  
121 10 (KO), 18 (dKD).

122

123 To characterize the velocity transmission from the migration edge into the bulk of the  
124 monolayer, time-averaged velocity and order profiles were computed (Figure 1C). Here, we  
125 observed a subtle velocity decay in the range of the standard deviation with increasing  
126 distance from the migration edge for the WT and the ZO1 KO cells from about 20  $\mu\text{m h}^{-1}$  at  
127 the edge to 17  $\mu\text{m h}^{-1}$  (15% decrease) 400  $\mu\text{m}$  away from the edge, while the dKD cells  
128 showed a sharper velocity drop from approximately 12  $\mu\text{m h}^{-1}$  to 8  $\mu\text{m h}^{-1}$  (33% decrease),  
129 approaching a plateau at about 400  $\mu\text{m}$ , indicating an impaired velocity transmission from the  
130 edge into the layer. The order parameter decreased with increasing distance from the edge into  
131 the bulk layer for all three cell lines. Interestingly, for dKD cells the order parameter was not  
132 only lower at every distance from the edge but even approached zero at approximately  
133 600  $\mu\text{m}$  (indicating zero net movement towards the edge). This highlights that the cell  
134 collectivity was diminished, which goes hand in hand with the increased number of leader  
135 cells emerging from the dKD layers (Figure 1B). Almost twice as many leader cells were  
136 observed in the dKD ( $11 \pm 2 \text{ mm}^{-1}$  (mean  $\pm$  s.d.)) as in the WT monolayers ( $6 \pm 2 \text{ mm}^{-1}$   
137 (mean  $\pm$  s.d.),  $p < 0.001$ ). The ZO1 KO cells also showed an elevated number of leader cells

138  $(8 \pm 2 \text{ mm}^{-1}$  (mean  $\pm$  s.d.),  $p < 0.01$ ) compared with the WT, albeit less leader cells than the  
139 dKD variant.

140 To further study the reach of force transmission, we also computed the spatial velocity  
141 correlation of the migrating cells (Figure 1D). While the spatial velocity correlation of ZO1  
142 KO cells decayed slightly slower than that of WT cells, yielding longer correlations lengths of  
143  $63 \pm 9 \text{ }\mu\text{m}$  (mean  $\pm$  s.d.) for the KO than  $57 \pm 6 \text{ }\mu\text{m}$  (mean  $\pm$  s.d.) for the WT ( $p = 0.08$ ), dKD  
144 cells showed considerably shorter correlation lengths of  $35 \pm 2 \text{ }\mu\text{m}$  (mean  $\pm$  s.d.) than both  
145 WT and ZO1 KO cells ( $p < 0.001$ , respectively).

146 Taken together, these findings suggest that ZO1/2 dKD cells migrate slower, less correlated,  
147 and less directed than the WT, thereby showing a significant loss of the hallmark parameters  
148 of cell collectivity. This behavior could be induced by a variety of mechanisms, from  
149 biochemical signaling to cell mechanical adaptations and possibly cellular jamming, in which  
150 the last two ones will be investigated further (*vide infra*).

151

## 152 **2.2 ZO proteins prevent jamming and cell crowding**

153 Already from visual inspection of the epithelia, it was obvious that the KO and particularly  
154 the dKD monolayers became increasingly dense over time during migration due to continuous  
155 proliferation, whereas the WT layers showed no obvious change in density. Therefore, we  
156 quantified this peculiarity and also examined the impact of crowding on collective migration.

157 While PIV is a well-established technique for the quantification of migration dynamics of cell  
158 collectives, it lacks information about the behavior of individual cells in the layer. To

159 overcome this limitation, we applied the automated cell segmentation algorithm Cellpose

160 (Stringer et al.) outlining the area occupied by each individual cell in 2D as shown in **Figure**

161 **2A.**<sup>[35]</sup>

162

## A Cell density and area quantification via segmentation of migrating monolayers

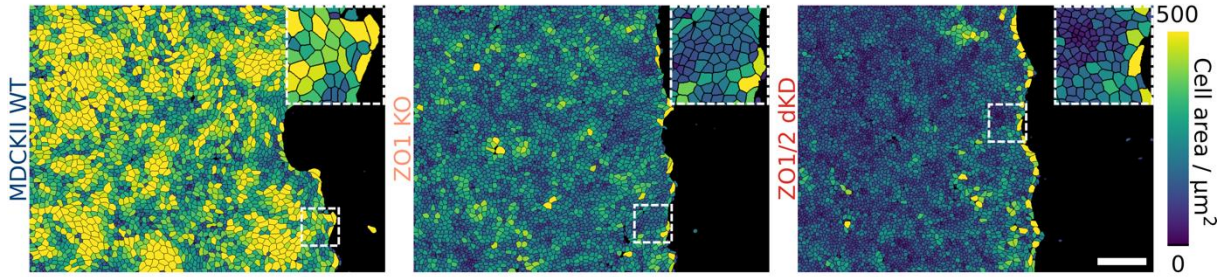

## B Tracking and MSD analysis

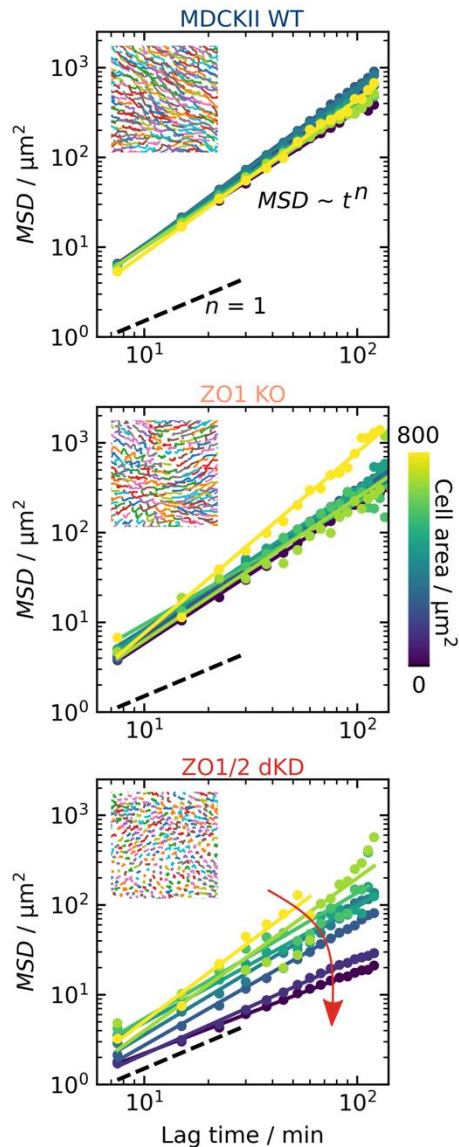

## C Cell area-dependent motility

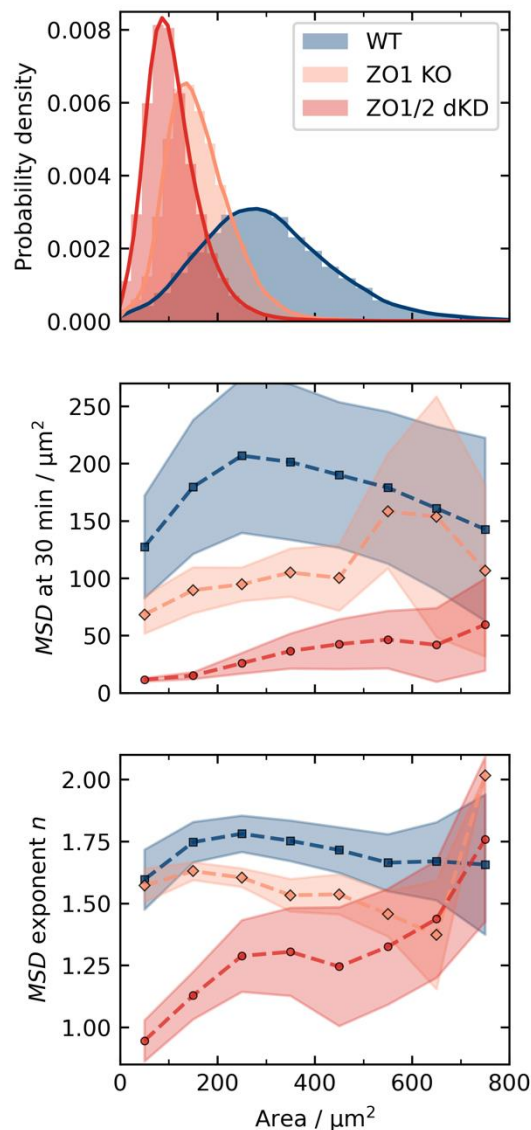

163 **Figure 2.** Cell area-dependent motility analysis based on segmentation and tracking, revealing  
 164 crowding-induced jamming of ZO depleted cells during late-stage migration. A) Segmented  
 165 cells in migrating monolayers after 20 h of migration, colored by the respective individual  
 166 projected area in 2D. Scale bar: 200  $\mu\text{m}$ . B) Tracking and mean-square-displacement (*MSD*)



167 analysis. *MSDs* and corresponding power law regression for a time window between 19 h and  
168 21 h are shown for cells in  $100 \mu\text{m}^2$  area bins. The insets show exemplary tracks colored  
169 randomly. The red arrow indicates a decrease of the *MSD* with decreasing area, only  
170 prominent for the dKD cells. C) Cell area-dependent *MSD* parameters from B. The area  
171 distribution of all cells after 20 h of migration is shown at the top. ZO protein interference  
172 induced a shift to smaller areas with a pronounced skewness of 1.23 for the KO and 2.25 for  
173 the dKD as compared with the WT cells (0.94). Below, the *MSD* at 30 min and the power law  
174 exponent  $n$  are plotted vs the cell area. Points correspond to bins of  $100 \mu\text{m}^2$  (around the point  
175 location), starting from  $0 \mu\text{m}^2$ . Means and standard deviations are shown. Sample sizes  
176 (independent experiments): 13 (WT), 9 (KO), 18 (dKD).

177

178 Indeed, we were able to quantify a severe lack of contact inhibition of proliferation for the  
179 dKD cells as indicated by a strong increase of the cell density over time during migration  
180 (Figure S1A), indicating a possible jamming mechanism that conceivably compromised  
181 migration dynamics and cooperativity. While the density of the WT cells remained  
182 approximately constant, the KO cells displayed a cellular density increase similar to dKD  
183 cells but not as pronounced. Yet, this density increase could also come from a lack of edge  
184 displacement combined with additional cells moving into the field of view. To confirm that  
185 mainly proliferation induced the density increase, we quantified cell density without a  
186 migration edge in a separate experiment (Figure S1D). Indeed, the dKD cell density increased  
187 stronger within the first 60 h and then reached a higher steady-state density than either WT or  
188 KO cells.

189 Two prominent parameters can be employed to characterize jamming transitions of cell  
190 layers: cell density and cell shape. Particle-based models attribute jamming to an increased  
191 cell density,<sup>[36]</sup> whereas vertex models predict the shape of cells, as quantified by the shape  
192 index or the projected aspect ratio in 2D, to be the main determinant for jamming.<sup>[23]</sup>

193 However, along with the density increase with elapsed time, we did not observe a clear  
194 change in the projected cell aspect ratio in 2D (length divided by width) as shown in Figure  
195 S1A. Except for a short increase to a median aspect ratio of 1.60 around 5 h for the WT, all  
196 cell lines had a similar and only very subtly decreasing aspect ratio at around 1.45. However,  
197 the WT cells exhibited a slightly higher aspect ratio at all times, with a slightly broader  
198 distribution shifted to larger values (Figure S1B). Note that the observed aspect ratio values  
199 here are above the jamming threshold of 1.18,<sup>[20]</sup> as calculated from the shape index of 3.81 as  
200 previously proposed by Bi et al.<sup>[23]</sup> Notably, there was no correlated variation between cell  
201 area and aspect ratio of individual cells (Figure S1C), rendering these parameters largely  
202 independent of each other for each cell.

203 The decrease of migration velocity over time of dKD cells together with their increased  
204 proliferation indicate jamming as a pivotal determinant of these cells. A marked difference in  
205 the averaged PIV data of WT and ZO1-KO became apparent only after 15 h, when the KO  
206 also slowed down and showed uncontrolled proliferation and slightly decreasing aspect ratios,  
207 similar to the behavior of dKD cells. However, the dKD cells display the slowest dynamics of  
208 all three cell lines, which could not be attributed solely to a change in the cell density, as this  
209 was also altered in ZO1-KO cells.

210 So far, our purely mesoscopic approach reveals a morphological heterogeneity (small and  
211 large cells) particularly for dKD cells at later time points (Figure 2A). This brought up the  
212 question, whether these morphological differences could be responsible for the impaired  
213 cellular dynamics. Therefore, we utilized single cell tracking to investigate the dynamics of  
214 individual cells in a layer during late-stage migration (19-21 h after insert removal),  
215 depending on the cell density and the projected cell area in 2D. We found that the motility, as  
216 quantified by the *MSD* (mean square displacement), of WT and KO cells generally did not  
217 depend on the cell area. In contrast, the *MSDs* of individual dKD cells show a clear  
218 dependency on cell area (Figure 2B). Specifically, we observed that the movement amplitude

219 (*MSD* at 30 min) as well as the exponent  $n$  of the *MSDs* as a function of lag time rises with  
220 increasing cell area for the dKD. The small and most abundant bulk cells with an area around  
221 the distribution peak of about  $120 \mu\text{m}^2$  showed passive diffusion-like movement with  $n \sim 1$   
222 and small amplitudes of about  $10 \mu\text{m}^2$ . In contrast, the larger cells exhibited active motion  
223 with up to  $n = 1.75$ , which is similar to the WT cells and close to straight-line motion at  
224  $n = 1.75$ , and five-fold increased amplitudes of  $50 \mu\text{m}^2$  (Figure 2C). The KO cells had a  
225 similarly skewed cell area distribution with small bulk cell of about  $180 \mu\text{m}^2$  showing  
226 movement amplitudes of about  $80 \mu\text{m}^2$  while the sparse large cells moved about 110-  
227  $200 \mu\text{m}^2$ . However, neither WT nor KO cells showed any clear dependence of  $n$  on the cell  
228 area. Interestingly, the WT showed a more symmetrical cell-area distribution around  $280 \mu\text{m}^2$   
229 (skewness of 0.94 as compared with 1.23 for the KO and 2.25 for the dKD cells) with  
230 averaged-sized cells showing the largest movements (*MSD* around  $200 \mu\text{m}^2$ ) and cells at the  
231 extreme ends of the distribution moving less (*MSD* of about  $130 \mu\text{m}^2$ ). Importantly, we did  
232 not find any clear dependence of the individual cell motility on the aspect ratio (Figure S1B).  
233 Together, these results show that cell density is the determining factor explaining the  
234 observed jamming of dKD cells due to an abundance of slow-moving small cells coexisting  
235 with faster-moving large and actively dividing cells.

236 As we have identified an important connection between jamming, proliferation, and migration  
237 speed in cells lacking ZO proteins, we aimed to reverse the cellular crowding and jamming by  
238 the inhibition of proliferation using the well-established drug Mitomycin C.<sup>[19,21,37–39]</sup> As  
239 expected, upon Mitomycin C treatment, the density of all three cell lines did not increase but  
240 instead even slightly decreased over time, confirming a successful inhibition of proliferation  
241 (Figure S2A). Concomitantly, the migration velocity increased while the overall aspect ratio  
242 slightly decreased over time. To quantify the impact of proliferation inhibition, we now  
243 focused on the late-stage migration dynamics after 19 h (**Figure 3A**).

244 The drug increased the migration speed of WT MDCK II cells from  $19 \pm 6 \mu\text{m h}^{-1}$  to  
245  $29 \pm 2 \mu\text{m h}^{-1}$  (mean  $\pm$  s.d.,  $p < 0.001$ ), whereas the order parameter and correlation length did  
246 not change significantly ( $p = 0.15$  and  $p = 0.26$ , respectively).  
247

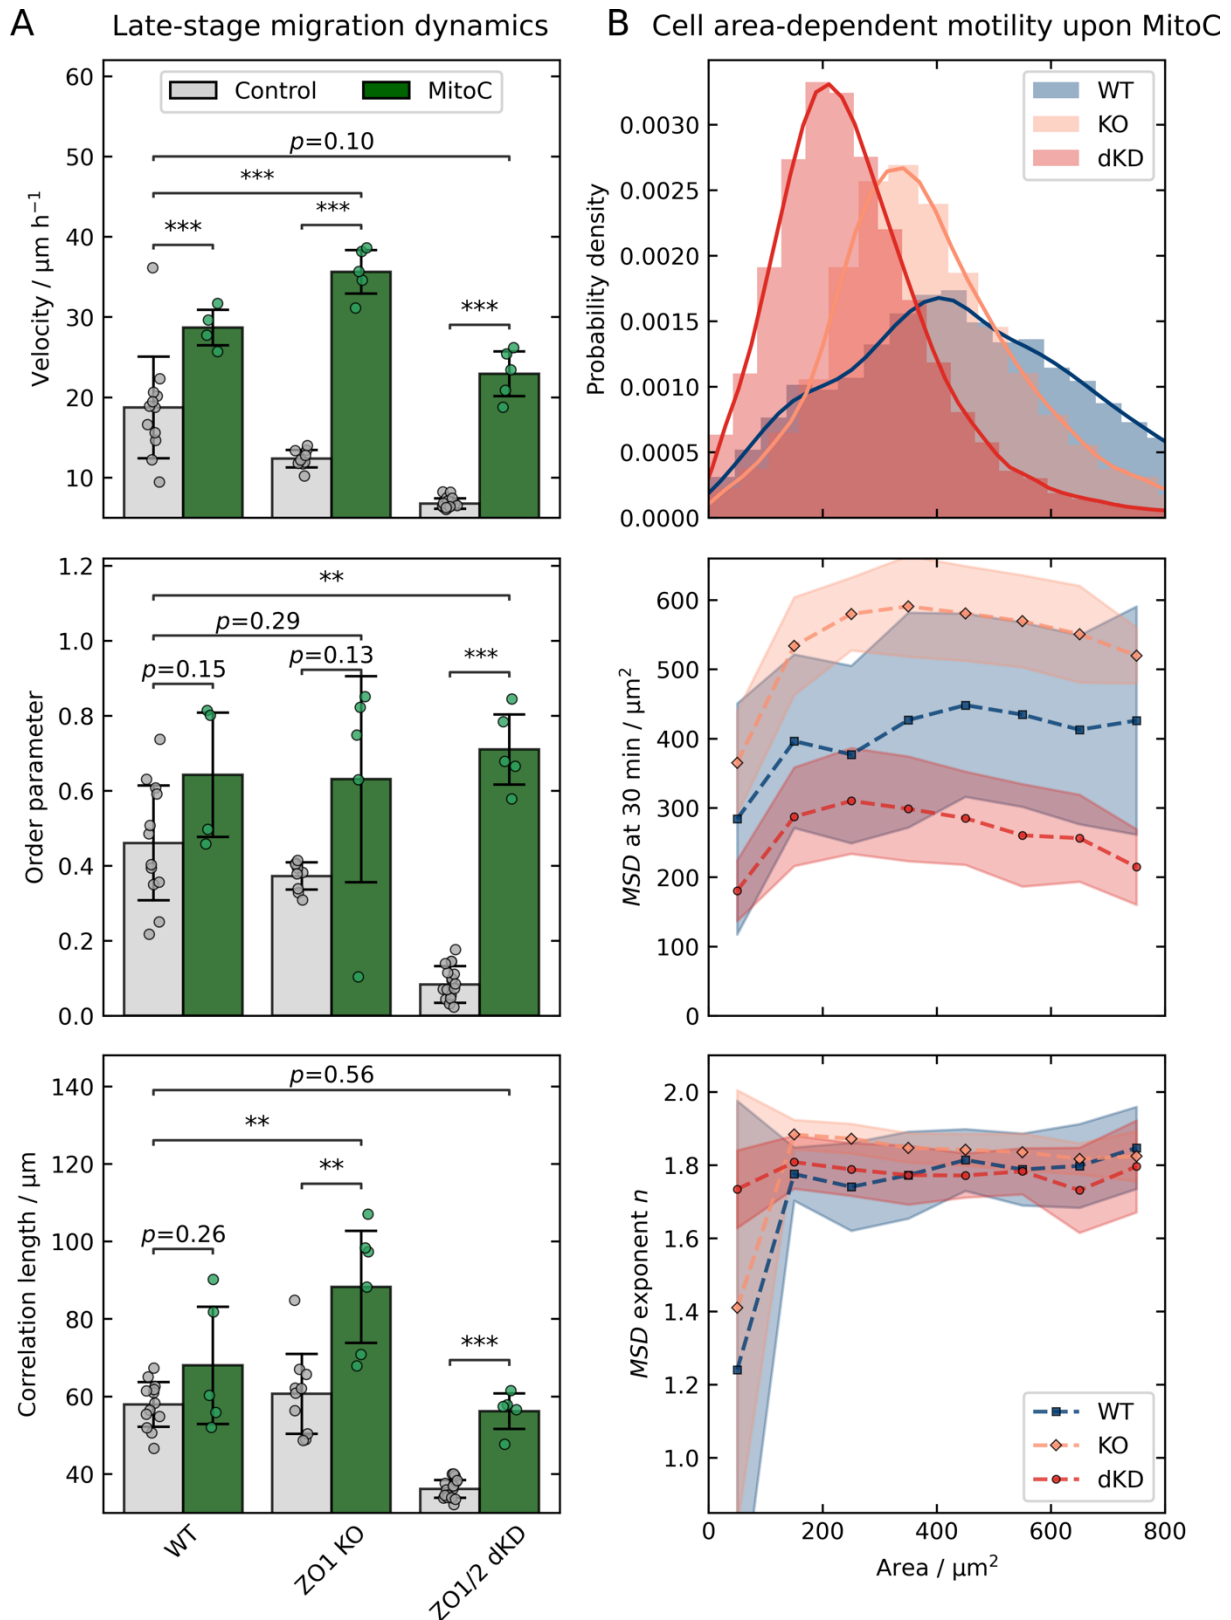

248 **Figure 3.** Late-stage collective migration dynamics enhanced by proliferation inhibition with  
 249 Mitomycin C (MitoC). A) Migration dynamics after 19 h with (control) and without  
 250 proliferation (MitoC). Overall velocity, order and correlation were calculated as in Figure 1.  
 251 B) Cell area-dependent *MSD* parameters upon proliferation inhibition (MitoC treatment). The

252 area distribution of all MitoC-treated cells at 20 h of migration is shown at the top. Larger cell  
253 areas and skewness parameters of 1.01 (WT), 1.36 (KO), and 1.83 (dKD) were observed.  
254 Below, the *MSD* at 30 min and the power law exponent  $n$  are plotted vs the cell area. *MSDs*  
255 and corresponding power law fits were calculated for a time window between 19 h and 21 h,  
256 in accordance with Figure 2. Points correspond to bins of  $100 \mu\text{m}^2$  (around the point location),  
257 starting from  $0 \mu\text{m}^2$ . Means and standard deviations are shown.  
258  
259 In contrast, we observed a significant increase of all migration parameters for the dKD cells  
260 (Figure 3A) explaining the observed boost in dynamics. Specifically, the dKD velocity  
261 increased from  $7 \pm 1 \mu\text{m h}^{-1}$  to  $23 \pm 3 \mu\text{m h}^{-1}$  (mean  $\pm$  s.d.,  $p < 0.001$ ), which is even slightly  
262 higher than the velocity of untreated WT cells ( $p = 0.10$ ), the order increased from  
263  $0.08 \pm 0.05$  to  $0.7 \pm 0.1$  (mean  $\pm$  s.d.,  $p < 0.001$ ), which is significantly higher than that of  
264 untreated WT cells ( $0.5 \pm 0.2$  (mean  $\pm$  s.d.,  $p < 0.01$ )), and the correlation length increased  
265 from  $36 \pm 2 \mu\text{m}$  to  $56 \pm 5 \mu\text{m}$  (mean  $\pm$  s.d.,  $p < 0.001$ ), which is similar to the correlation  
266 length of untreated WT cells, being  $58 \pm 6 \mu\text{m}$  (mean  $\pm$  s.d.,  $p = 0.56$ ).  
267 The ZO 1 KO cells showed a similar behavior as the dKD cells upon proliferation inhibition,  
268 but with a less pronounced increase in all parameters. The velocity of KO cells increased in  
269 the presence of Mitomycin C from  $12 \pm 1 \mu\text{m h}^{-1}$  to  $35 \pm 3 \mu\text{m h}^{-1}$  (mean  $\pm$  s.d.,  $p < 0.001$ ),  
270 which is also significantly higher than the velocity of untreated WT cells ( $p < 0.001$ ), the  
271 order parameter increased from  $0.37 \pm 0.04$  to  $0.6 \pm 0.3$  (mean  $\pm$  s.d.,  $p = 0.13$ ), which is  
272 slightly higher than the order parameter of untreated WT cells ( $p = 0.29$ ), and the correlation  
273 length increased from  $61 \pm 10 \mu\text{m}$  to  $88 \pm 14 \mu\text{m}$  (mean  $\pm$  s.d.,  $p < 0.01$ ), which is also higher  
274 than the correlation length of untreated WT cells ( $p < 0.01$ ).  
275 Taken together, the velocimetry data clearly showed that inhibition of proliferation largely  
276 reversed the jamming process of dKD, and, less pronounced, that of ZO1 KO cells, by  
277 preventing an uncontrolled density increase.

278 Interestingly, the area-dependence of the *MSD* of dKD cells during late migration (19-21 h,  
279 *vide supra*) also vanished upon inhibition of proliferation (Figure 3B). In general, the  
280 individual cell area was larger in the presence Mitomycin C for all three cell lines as expected  
281 for proliferation inhibition. This was most pronounced for dKD cells, where the cell area  
282 increased from  $120 \mu\text{m}^2$  to about  $220 \mu\text{m}^2$  (see area distribution in Figure 3B). The *MSD* also  
283 showed a higher amplitude (*MSD* at 30 min) as well as exponent  $n$  for all treated cell lines  
284 than for untreated cells. Specifically, the dKD *MSD* amplitude was between  $200 \mu\text{m}^2$  and  $300$   
285  $\mu\text{m}^2$  upon proliferation inhibition, which is slightly higher than for the untreated WT cells  
286 ( $150\text{-}200 \mu\text{m}^2$ ). The treated WT cells showed slightly larger amplitudes of  $300\text{-}400 \mu\text{m}^2$  and  
287 the KO cells surpassed both other cell lines at about  $300\text{-}550 \mu\text{m}^2$ . Interestingly, the *MSD*  
288 exponent is equalized upon proliferation inhibition for all cell lines at about 1.8, which  
289 indicates completely restored directionality. This is in good accordance with the higher order  
290 parameter upon proliferation inhibition as shown in Figure 3A (*vide supra*).

291 Notably, upon proliferation inhibition we did not observe a clear trend in the movement  
292 amplitude and the *MSD* exponent with decreasing cell area as before anymore (Figure 3B). In  
293 contrast to untreated KO and dKD cells, upon inhibited proliferation the KO and dKD bulk  
294 cells of about  $380 \mu\text{m}^2$  and  $220 \mu\text{m}^2$ , respectively, even showed a slight peak in the movement  
295 amplitude while larger and smaller cells both moved slightly less. The *MSD* exponent  
296 remained constant with varying area.

297 Together, these results indicate that the strong crowding-induced jamming could be reversed  
298 by the inhibition of proliferation. However, it is important to note that, besides proliferation,  
299 Mitomycin C might also influence other cellular functions, which could potentially contribute  
300 to the observed migration dynamics.

301

302

303

### 304 **2.3 Successful ZO knockdown induces actomyosin remodeling**

305 Given such severe phenotypical changes in the migration dynamics and proliferation rates of  
306 the ZO1 KO and dKD cells, we sought to investigate the phenomena also on the molecular  
307 level.

308 First, to ensure successful genetic knockout, we performed confocal immunofluorescence  
309 microscopy. Indeed, ZO1 and ZO2 proteins were no longer visible upon double knockdown  
310 (Figure S3). Corresponding western blot analyses can be found in Beutel et al.<sup>[40]</sup>

311 ZO1 knockout was also successful as shown in Figure S3A. Importantly, ZO2 was only  
312 slightly upregulated indicating a possible compensation for ZO1. Notably, adherens junctions  
313 are not obviously affected (Figure S4) highlighting that the observations described here  
314 mainly reflect the ZO protein loss.

315 Since the transmembrane proteins in tight junctions are connected to the actin cytoskeleton  
316 via ZO proteins, we next investigated changes in the actomyosin architecture of the cells  
317 (**Figure 4**). Indeed, the actin cytoskeleton of the dKD cells was changed in a distinct way as  
318 shown in Figure 4C. Actin was accumulated at the periphery of individual cells, organized in  
319 thick rings, which were slightly separated at the apical plane of neighboring cells. ZO1  
320 knockout cells on the other hand showed an intermediate phenotype with a less marked actin  
321 accumulation at cell-cell borders with a slight separation into two thinner cables. In  
322 comparison, the WT cells displayed the typical actin structure of MDCK II cells with a  
323 continuous mesh between cells and without any separation between neighboring cells or any  
324 obvious actin accumulation.

325



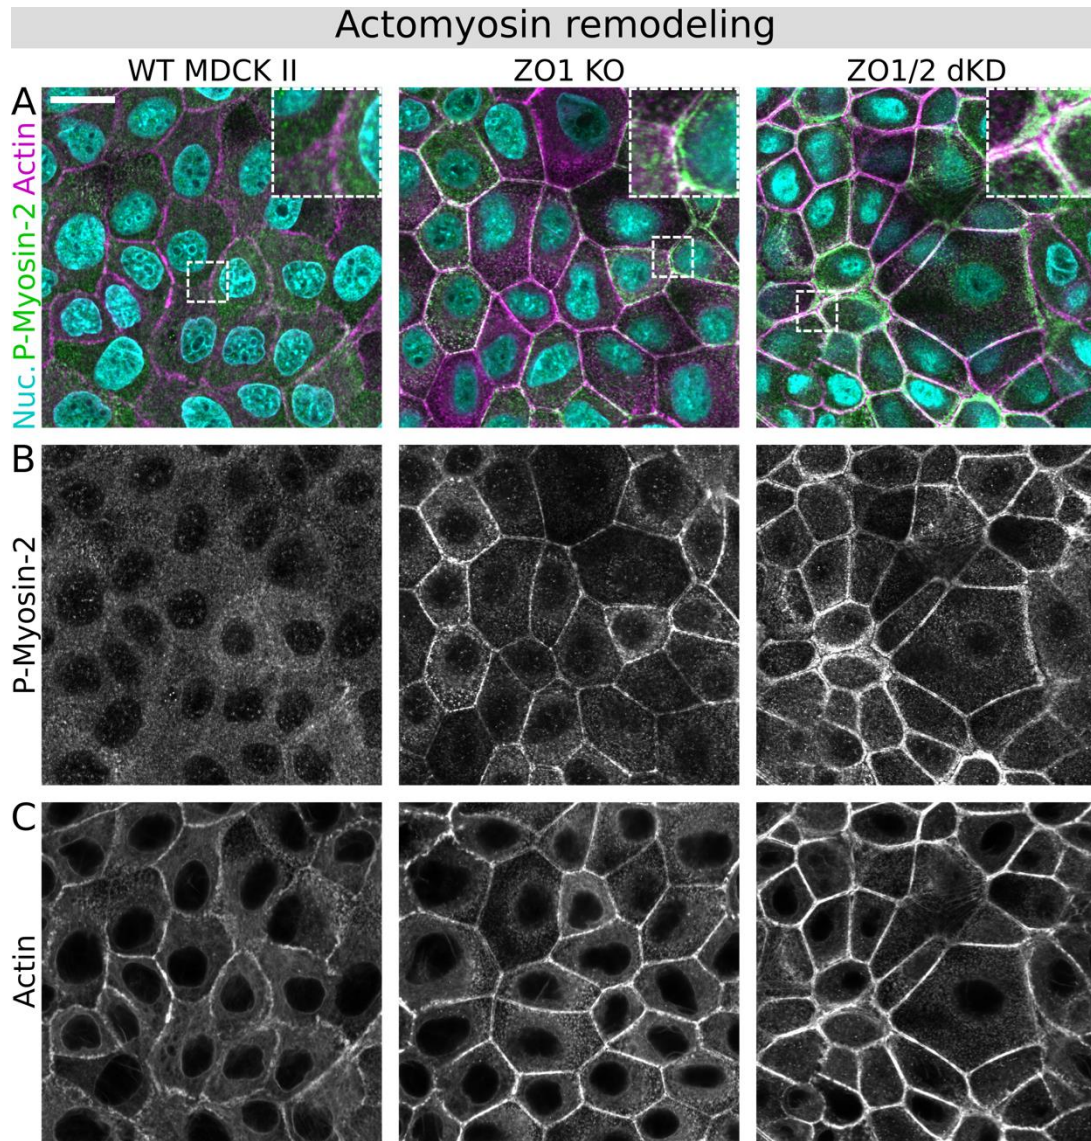

326 **Figure 4.** Actomyosin architecture remodeling upon ZO protein interference. A)  
327 Phosphorylated Myosin-2 (P-Myosin-2; green), actin (magenta) and nuclei co-staining of all  
328 three MDCK II cell lines. B) Corresponding gray-scale images of P-Myosin-2. C)  
329 Corresponding gray-scale images of actin. Scale bar: 20  $\mu$ m.  
330  
331 In addition, activated (phospho-) myosin-2 upregulation was particularly prominent at the  
332 cell-cell border in conjunction with the actin accumulation in dKD cells (Figure 4B),  
333 indicating upregulated actomyosin contractility. Interestingly, it seems that smaller dKD cells  
334 accumulated more peripheral actomyosin than their larger neighbors. On the other hand, ZO1  
335 KO also showed accumulation of activated myosin at the cell periphery, albeit not as severe

336 as in the dKD. In contrast, the WT cells showed little activated myosin without any prominent  
337 pattern or structure. Additionally, the occurrence of many small and some large dKD cells (as  
338 described above) was observed. In contrast, the WT and KO cell area appeared much more  
339 homogeneous.

340 Taken together, these findings show that interfering with ZO proteins induces actin  
341 remodeling accompanied by myosin activation and accumulation, suggesting possible cell  
342 mechanical and morphological changes.

343

#### 344 **2.4 The cell topography reflects actomyosin remodeling upon ZO knockdown and shows** 345 **a heterogeneous apical cell height distribution**

346 Because severe actomyosin remodeling and accumulation at the apical cell periphery was  
347 observed, we also expected changes in the cellular topography (**Figure 5**). Consistent with the  
348 changes in the actomyosin structures, using AFM (atomic force microscopy) imaging we  
349 found prominently elevated ring-like structures at the periphery of individual dKD cells,  
350 slightly separated from each other (zoom-in in Figure 5A). In contrast, wild type cells exhibit  
351 a less pronounced but continuous cell border. ZO1 KO cells showed only a slight change of  
352 the cell border topography.

353

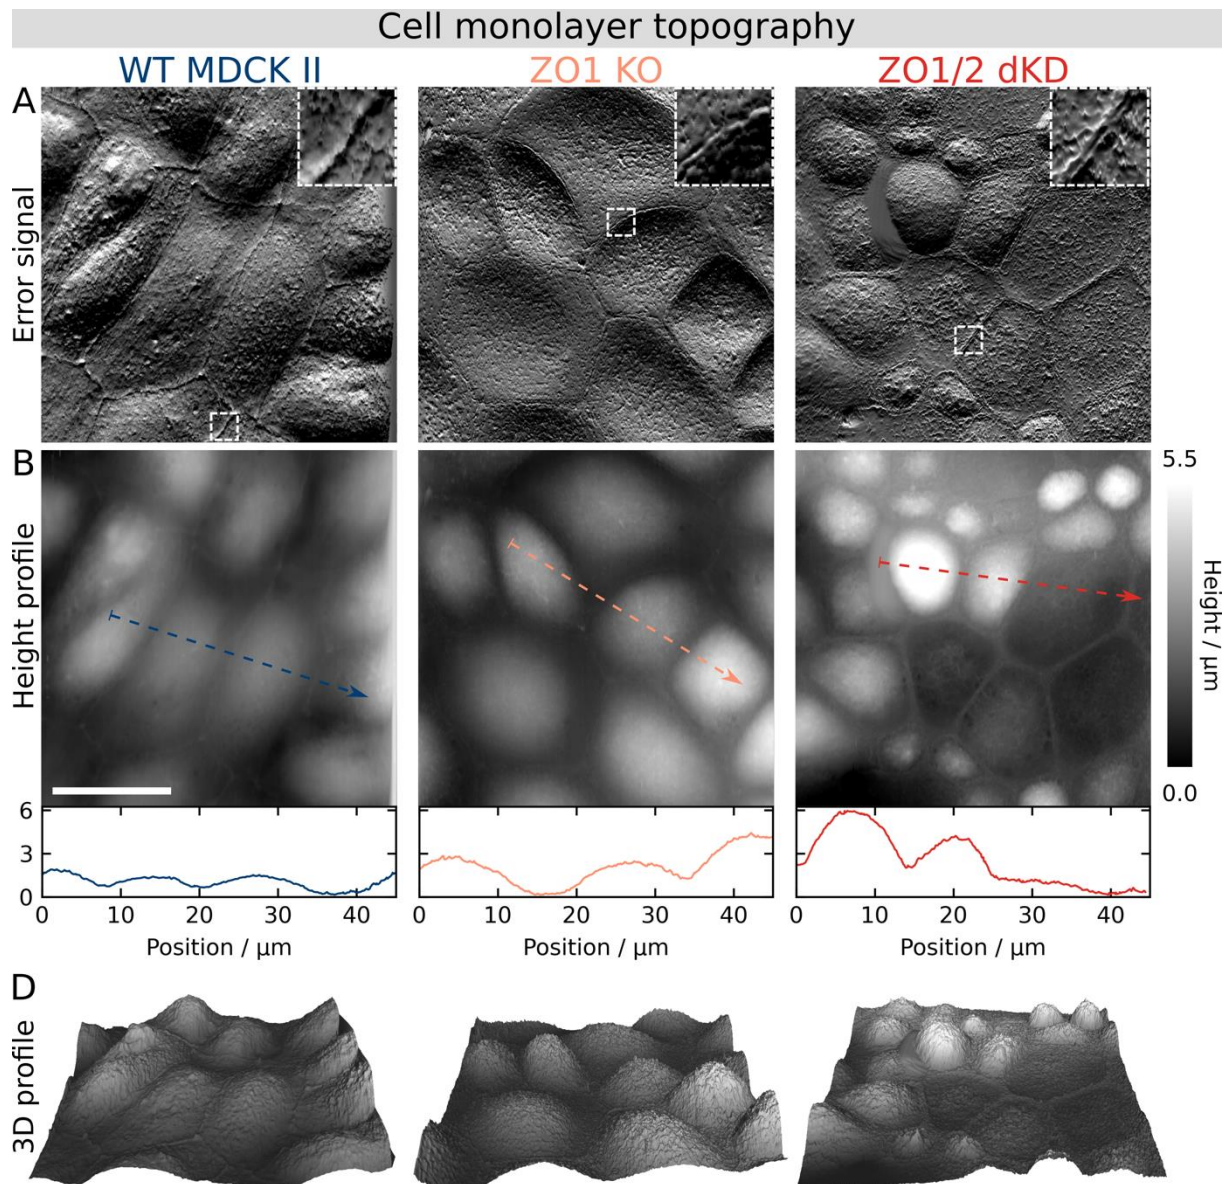

354 **Figure 5.** Cell monolayer topography adaptations reflect the actomyosin remodeling upon ZO  
355 protein interference as shown by AFM imaging. A) Error signal (deflection images). B)  
356 Height profile and cross-sections. D) Corresponding 3D topography maps, slightly up-scaled  
357 vertically, with the  $z$ -axis length being 20% of the  $x/y$ -axis (13.3% corresponds to an aspect  
358 ratio of 1). Scale bar: 20  $\mu\text{m}$ .

359

360 Furthermore, AFM imaging confirmed the data from confocal fluorescence microscopy and  
361 segmentation indicating a pronounced height and area heterogeneity in dKD cells. While the  
362 apical cap of cells with a small area of about  $100 \mu\text{m}^2$  (compare with chapter 2.2) was several

363 micrometers high ( $> 3 \mu\text{m}$ ), other cells were larger in area but do not exhibit any distinct  
364 apical cap rising above the peripheral ring. In comparison, the apical cap of WT cells was  
365 typically 1-1.5  $\mu\text{m}$  high and homogeneously distributed across the monolayer. The ZO1 KO  
366 cells displayed an intermediate phenotype with a homogenous cap height distribution, which  
367 are typically slightly higher than WT cells, at about 2-3  $\mu\text{m}$ .

368 In conjunction with the actomyosin results, these data show that ZO1/2 dKD consistently  
369 induces distinct molecular and topographical changes, most notably, severe actomyosin  
370 accumulation underneath the membrane at the cell-cell borders in the small cell population  
371 being responsible for altered mechanical properties, which are scrutinized in the next chapter.

372

### 373 **2.5 ZO proteins are necessary for mechanical integrity and tissue fluidity**

374 In light of the prominent cell topography adaptations and concomitant actomyosin  
375 remodeling, and because contact inhibition of proliferation and jamming are typically tightly  
376 coupled with cellular mechanics, the consequences of ZO depletion for cell mechanics were  
377 investigated. To this end, we performed AFM measurements with an emphasis on force  
378 relaxation experiments that also permit to assess the rheological properties of the cells. First,  
379 force volume imaging showed that stiffness was increased considerably at the cell periphery  
380 of ZO1 KO and dKD compared with WT cells (AFM maps in **Figure 6A**), whereas the center  
381 appeared to be softer compared with WT cells.

382

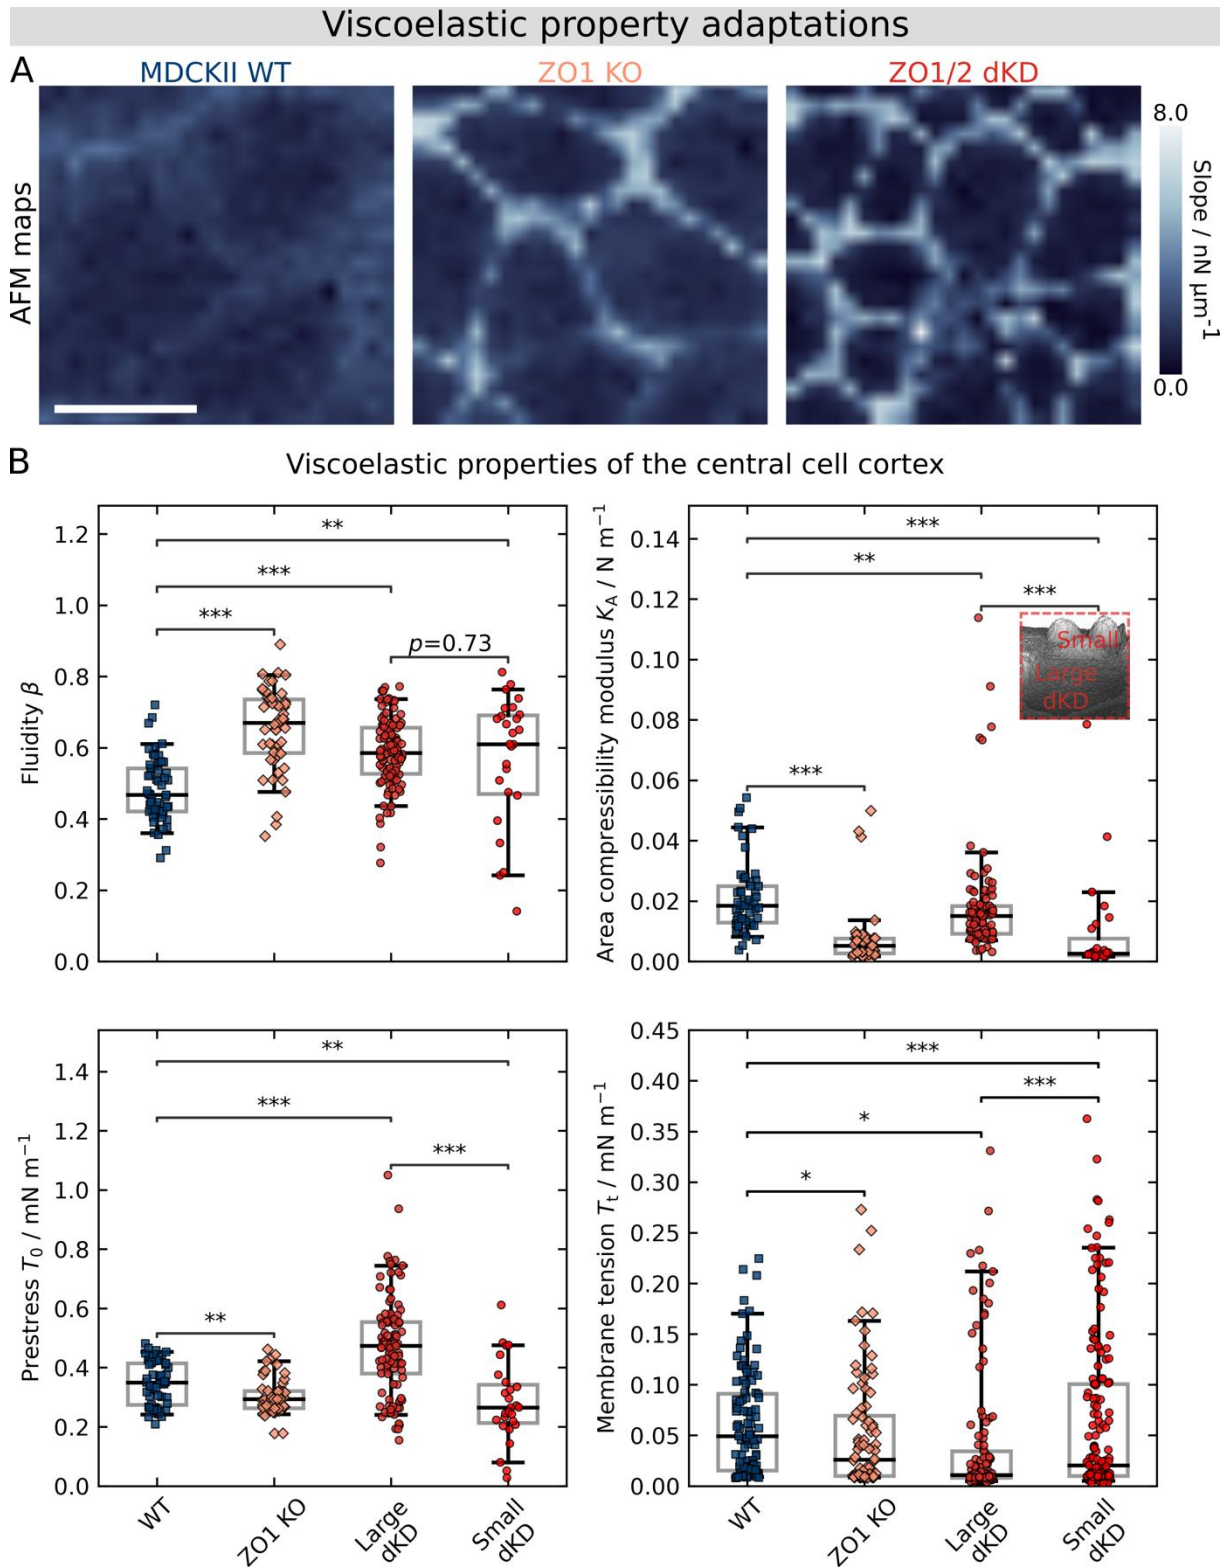

383 **Figure 6.** ZO proteins ensure viscoelastic integrity of cells as shown by AFM (atomic force  
 384 microscopy). A) Exemplary AFM maps of migrating WT, ZO1 KO and ZO1/2 dKD cells  
 385 showing the slope of the force during contact, mirroring the apparent stiffness of cells. Scale  
 386 bar:  $20 \mu\text{m}$ . B) Site-specific viscoelastic properties of the central cell cortex. Fluidity  $\beta$ , area

387 compressibility modulus  $K_A$ , prestress  $T_0$ , and membrane tension  $T_t$  are shown. Five curves  
388 were immediately recorded on the same position at the center of one cell. Individual data points  
389 represent the average of the respective fitting parameter for an individual cell. The boxes show  
390 the median and the upper and lower quartiles. Whiskers indicate the 5<sup>th</sup> and 95<sup>th</sup> percentile.  
391  
392 This is consistent with the observed accumulation of actin into a contractile actomyosin ring  
393 and the altered topography at the cell periphery of ZO depleted cells. Apart from stiffness  
394 maps, we also used site-specific indentation experiments followed by force relaxation to study  
395 the mechanical and rheological cortex properties in greater detail. The model we applied was  
396 introduced recently by Cordes et al.<sup>[41]</sup> Briefly, it considers stress relaxation of the cortex  
397 according to a power law providing us with a prestress corresponding to the isotropic cortical  
398 tension  $T_0$  plus membrane tension  $T_t$ , the area compressibility modulus  $K_A$  of the cortex and  
399 the fluidity  $\beta$ , which classifies the flowing propensity of the network. A  $\beta$  value of 1  
400 corresponds to a Newtonian fluid whereas a value of 0 describes a solid. Since we observed a  
401 prominent heterogeneity of the dKD cell morphology with a flat surface observed for large  
402 cells and a high apical cap seen for smaller cells, we considered the resulting geometrical  
403 differences in the model and distinguished between large (about 200  $\mu\text{m}^2$ ) and small dKD  
404 cells (80  $\mu\text{m}^2$ ).  
405 Notably, we observed statistically significant changes in all mechanical parameters upon ZO  
406 protein loss (Figure 6B).  
407 Cortex-dominated prestress  $T_0$  was significantly lower in the center of KO ( $0.30 \pm 0.06$   
408 (median  $\pm$  s.d.)  $\text{mN m}^{-1}$ ,  $p < 0.01$ ) and small dKD cells ( $0.27 \pm 0.13$  (median  $\pm$  s.d.)  $\text{mN m}^{-1}$ ,  
409  $p < 0.01$ ) than in the center of WT cells ( $0.35 \pm 0.07$  (median  $\pm$  s.d.)  $\text{mN m}^{-1}$ ), indicating a  
410 downregulation of the actin cortex in both populations due to remodeling of the actin  
411 cytoskeleton. In contrast, the large dKD cells showed an increased prestress  
412 ( $0.47 \pm 0.16$  (median  $\pm$  s.d.)  $\text{mN m}^{-1}$ ,  $p < 0.001$  compared with WT as well as with small dKD

413 cells). This goes hand in hand with a flatter morphology indicative of area expansion, leading  
414 to higher tension - Generally, the prestress  $T_0$  contains contributions from i) membrane tension  
415 that originates from adhesion of the plasma membrane to the underlying cytoskeleton, ii) area  
416 expansion of the apical shell and iii) active contraction by myosin II motors. To tell apart the  
417 contribution of the actin cortex from that of the plasma membrane-cytoskeleton attachment to  
418 the prestress  $T_0$  we additionally pulled out membrane tethers upon retraction to measure the  
419 membrane tension  $T_t$ . We observed that  $T_t$  decreased upon ZO protein KO for all cell lines. It  
420 dropped from  $0.05 \pm 0.05$  (median  $\pm$  s.d.)  $\text{mN m}^{-1}$  (WT) to  $0.03 \pm 0.06$  (median  $\pm$  s.d.)  $\text{mN m}^{-1}$   
421 (KO,  $p < 0.05$ ),  $0.01 \pm 0.09$  (median  $\pm$  s.d.)  $\text{mN m}^{-1}$  (large dKD,  $p < 0.001$ ), and to  
422  $0.02 \pm 0.08$  (median  $\pm$  s.d.)  $\text{mN m}^{-1}$  (small dKD,  $p < 0.05$ ). This shows that the prestress  
423 changes were only partly explainable by a decrease in membrane tension. However, the  
424 membrane tension of large dKD cells decreased, supporting the idea that prestress of the  
425 larger and flatter dKD cells stems from area expansion rather than a reinforced attachment of  
426 the cortex to the membrane.

427 Along with smaller prestress, we also observed a fluidization of the cortex represented by an  
428 increase of  $\beta$  from  $0.5 \pm 0.1$  (median  $\pm$  s.d.) to  $\beta = 0.7 \pm 0.1$  (median  $\pm$  s.d.,  $p < 0.001$ ) for KO  
429 cells, and to  $\beta = 0.6 \pm 0.2$  (median  $\pm$  s.d.,  $p < 0.01$ ) for the small dKD cells, respectively.

430 Also, for large dKD cells an increase in fluidity was found ( $\beta = 0.6 \pm 0.1$  (median  $\pm$  s.d.),  
431  $p < 0.001$ ). Recently we showed that fluidity and area compressibility modulus of the cortex  
432 are not necessarily independent parameters. Accordingly, the area compressibility modulus  
433  $K_A$  decreased from  $0.02 \pm 0.01$  (median  $\pm$  s.d.)  $\text{mN m}^{-1}$  for WT to  
434  $0.005 \pm 0.001$  (median  $\pm$  s.d.)  $\text{mN m}^{-1}$  for KO ( $p < 0.001$ ) and to even  
435  $0.003 \pm 0.002$  (median  $\pm$  s.d.)  $\text{mN m}^{-1}$  for small dKD cells ( $p < 0.001$ ), respectively. For the  
436 large dKD cells,  $K_A$  fell by only 50% to  $0.01 \pm 0.01$  (median  $\pm$  s.d.)  $\text{mN m}^{-1}$  ( $p < 0.01$ ) albeit  
437 the fluidity was rather high ( $\beta = 0.6 \pm 0.1$ ). Notably, the large dKD cells show a significantly  
438 higher  $K_A$  than the small dKD cells. This might indicate the presence of a prestressed cortex

439 with less membrane reservoir to compensate for the external deformation. This view is backed  
440 up by the finding that the geometrical apical membrane of the large dKD cells is also larger  
441 than that of the small dKD cells despite the apical bulging (as inferred from geometrical  
442 considerations based on the topography measurements in Figure 5). Interestingly, the large  
443 and prestressed dKD cells were observed to proliferate over twice as much as the small dKD  
444 cells (Figure S5), indicating a possible connection between the mechanical phenotype of the  
445 large dKD cells and proliferation.

446 The drop in area compressibility modulus in the small dKD and KO cells could be either due  
447 to a higher cortical elasticity or a larger apical excess area, giving rise to apparent area  
448 compressibility modules. Considering the substantial morphological changes of the apical  
449 membrane/cortex in response to ZO1/2 knock down, such as bulging of the cortex and the  
450 reported occurrence of membrane reservoirs (small dKD cells), it is conceivable that both  
451 effects contribute to the observed softening.

452 Taken together, these findings show a mechanical integrity loss upon ZO protein knockout:  
453 Actomyosin is recruited from the cortex to the periphery of individual cells building up a stiff  
454 and contractile actomyosin ring while leaving the apical cortex weakened. On one hand, this  
455 leads to bulging of the central cell cortex, formation of excess area, and fluidization of the  
456 cortex in small dKD cells. On the other hand, large dKD cells are prestressed by the  
457 contractile small cells and thereby seem to start proliferating. In turn, jamming of the small  
458 dKD cells in combination with the uncontrolled proliferation eventually impair collective  
459 migration.

460

461



#### 462 **4. Discussion**

463 In this study, we were able to show that efficient collective cell migration depends on the tight  
464 junction ZO proteins. We show that ZO protein loss leads to severe cellular crowding and  
465 eventually jamming, which is fostered by morphological, mechanical, and cytoskeletal  
466 integrity loss.

467

468 Essentially, we found that ZO protein loss leads to formation of thick and contractile  
469 perijunctional actomyosin cables. This is in line with previous characterizations of cells  
470 lacking ZO proteins.<sup>[1,4,8,11]</sup> Particularly, recent evidence suggests that TJs provide a negative  
471 mechanical feedback to the actomyosin cytoskeleton of individual cells in a layer, so that they  
472 do not contract and pull excessively.<sup>[1]</sup> Because this feedback loop is missing in our cell lines,  
473 it is expected that most individual cells contract in an uncontrolled manner.

474 Indeed, many cells contract excessively via the perijunctional actomyosin ring. The  
475 constriction of this ring leads to laterally smaller cells with a projected area in 2D of about  
476  $80 \mu\text{m}^2$  that bulge out apically, presumably in order to maintain constant volume. Since actin  
477 is remodeled and potentially recruited from the cortex into these rings, the cortex is softened.  
478 These observations are in line with recent studies showing similar actomyosin remodeling in  
479 conjunction with such morphological changes, particularly of the cell cap.<sup>[1,4,8,11]</sup> In general,  
480 actomyosin remodeling is known to determine cell mechanical as well as morphological  
481 adaptations.<sup>[42-44]</sup> Together, the dome-like apical membrane and the weakened cortex result in  
482 excess membrane area accompanied by lower prestress and higher fluidity while the  
483 actomyosin ring itself becomes extremely stiff as visible in our force maps.

484 In contrast to our observations of softening and fluidization of the cell body, former work by  
485 Cartagena-Rivera and coworkers report a general tension and viscosity increase in ZO1/2  
486 knockout cells.<sup>[2]</sup> However, experiments in this study either targeted cell junctions directly or  
487 were carried out with much larger probes ( $> 20 \mu\text{m}$ ) than our conical indenters of only a few

488 tens of nanometers. Therefore, their measurements are integrated over a larger area capturing  
489 the mechanical response from both the extremely stiff cell borders and the soft cell body,  
490 which might explain the controversial findings.<sup>[2]</sup> Another reason could be the fact that the  
491 authors used much longer cell growth times than us of over one week. Coupled with the  
492 uncontrolled proliferation, this might explain the discrepancies in the observed mechanical  
493 behavior: Upon long culturing times, the cell layer becomes increasingly dense, meaning  
494 more cells and thereby actin rings per area which, in turn, will dominate the mechanical  
495 readout in those studies.

496

497 In addition to these contractile small cells, we observe a second phenotype only in cells  
498 lacking both ZO1 and 2 (dKD). This second cell phenotype is characterized by: 1) a larger  
499 projected area of 150-250  $\mu\text{m}^2$ , i.e., larger than most dKD cells but smaller than average WT  
500 cells, 2) thinner perijunctional actomyosin rings, 3) a flattening of the apical cortex, and 4)  
501 much higher prestress  $T_0$  and less excess membrane area than the dKD cells. Hence, two  
502 mechanically and morphologically distinct but coexisting dKD cell phenotypes emerge with  
503 time. For clarity, we distinguish between these two phenotypes and refer to them as *small* and  
504 *large* dKD cells.

505 The perijunctional actin contraction of the small cells is presumably responsible for the  
506 flattening and stretching of neighboring cells, which become larger. In response, the large  
507 cells need to sacrifice some of the excess area stored in the apical cell membrane, explaining  
508 the smaller decrease in  $K_A$  in contrast to the smaller dKD cells. Similarly, the pulling force  
509 from the contractile small cells is reflected in the increase in  $T_0$  in the large cells.

510 In essence, the small cells contract and thereby pull on the large cells and stretch them  
511 balancing the forces across the cell layer.

512 However, the large cells are unable to escape from the tensile stress into the third dimension.

513 As a consequence, the cells become laterally stressed and respond by proliferation, which

514 relaxes the lateral stress. In turn, the increased proliferation leads to higher cell densities and  
515 eventually to partial jamming, impairing cell migration.

516

517 These observations of uncontrolled proliferation and mechanical imbalances are in line with  
518 the idea that TJs are both biological signaling hubs<sup>[45,46]</sup> and mechanical sensors.<sup>[1,3]</sup> On one  
519 hand, ZO proteins have been shown to directly control proliferation through cell cycle  
520 arrest.<sup>[47,48]</sup> On the other hand, Rosenblatt and coworkers recently showed that mechanically  
521 stretched MDCK II cells divide more frequently than unstressed cells.<sup>[49]</sup> Mechanical stretch  
522 itself rapidly stimulates cell proliferation through activation of the Piezo 1 ion channel.<sup>[49]</sup> We  
523 propose that the contractile smaller cells provide exactly this kind of mechanical stimulus  
524 leading to cell divisions primarily of the larger, flat cells, which are stretched considerably. A  
525 statistical analysis by visual inspection (Figure S5) confirms this hypothesis and shows that  
526 larger cells proliferate more frequently, while smaller ones divide less.

527

528 This proliferation and cell density increase coupled with the single cell mechanical changes  
529 leads to migration disruption and jamming. Strikingly, evidence accumulates that particularly  
530 smaller cells are responsible for the onset of jamming in dKD cells.

531 Specifically, the differences in the jamming expansion of KO and dKD cells, respectively, can  
532 only be explained by the area-dependence of active migration on the individual cell area.

533 While the KO and WT cells display the same fast and active dynamics regardless of their cell  
534 area, dKD cells become increasingly less dynamic with decreasing cell areas. Particularly, the  
535 small dKD cells, which constitute the majority, show passive diffusion-like behavior with a  
536 power-law exponent of about 1, whereas the larger cells display active motion with a similar  
537 exponent to the WT cells of about 1.8. Accordingly, the small cells are particularly immobile  
538 and thereby impairing the migration of the whole dKD layer.

539 Together, these results draw the following picture (**Figure 7**): Small, immobile cells with  
540 thick actomyosin rings contract excessively and by that pull on their neighbors, which are  
541 laterally strained and flattened displaying a large projected area. The large cells respond to the  
542 lateral stress by proliferation leading to even more small cells and crowding.  
543

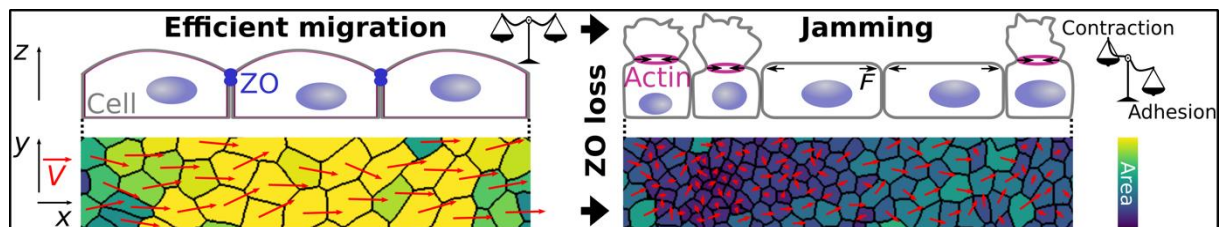

544 **Figure 7.** Proposed model of the delicate force balance necessary for cell layer fluidity. WT  
545 cells display a balance equilibrium between contraction and adhesion, and, thus, display a  
546 homogenous morphology and can migrate efficiently (left). In contrast, cells lacking ZO  
547 proteins develop a new and perturbed force balance leading to heterogeneous cell morphology  
548 and jamming (right). Two cell populations emerge: small, highly contractile cells with  
549 apically bulged-out excess membrane and large, stretched cells. The small cell population is  
550 particularly immobile and additional crowding amplifies this jamming.

551  
552 On a mesoscopic scale, both migration velocity and order are diminished in ZO1/2 dKD cells  
553 and, upon progressing migration and proliferation, also in ZO1 KO cells. This is in line with  
554 recent work showing the deceleration of migration in cells lacking ZO proteins.<sup>[5,50]</sup> For  
555 instance, endothelial cells lacking ZO1 were shown to migrate slower.<sup>[5]</sup> For MDCK II cells,  
556 Fedele et al. found that the migration dynamics of monolayers with already inhibited adherens  
557 junctions are diminished upon ZO1/2 double knockout.<sup>[50]</sup> In addition, ZO protein loss  
558 significantly shortens the spatial velocity correlation length. Along the same line, the KO and  
559 particularly the dKD monolayers develop more individual leader cells. Both velocity  
560 correlation and leader cell emergence were implicated as hallmarks of collective cell behavior

561 and mechanical coupling.<sup>[15,26,31,51,52]</sup> Accordingly, cells lacking ZO proteins behave less  
562 collectively and exhibit perturbed mechanical coupling.  
563 Yet, since cell mechanics and proliferation are tightly coupled, the relative impact of each on  
564 the stalled migration remains to be elucidated. Therefore, we investigated the peculiar  
565 relationship between cell mechanics and cell density by inhibiting proliferation. In line with  
566 recent studies, proliferation inhibition slightly increases migration speed in WT MDCK  
567 cells.<sup>[19,21]</sup> Strikingly, inhibiting the proliferation of dKD cells succeeds in almost complete  
568 recovery of the migration velocity, order, and correlation length observed for WT cells. This  
569 underlines the importance of the mechanically induced proliferation and cell crowding as a  
570 decisive control parameter for collective migration.

571  
572 The observation that MDCK cells at low densities show such a high, and at higher densities a  
573 significantly lower power-law exponent is shared by recent experimental evidence.<sup>[53,54]</sup> This  
574 general effect of cell density on collective migration dynamics is also in line with physical  
575 particle-based models of tissue dynamics.<sup>[36]</sup> These models predict cell density to be the main  
576 determinant parameter for collective motility with motion arrest at high densities. However, to  
577 our knowledge, the direct dependence of cell motility of individual cells in a monolayer on  
578 their projected area has not been observed experimentally before.

579 Interestingly, the cell shape (projected aspect ratio in 2D), as predicted by vertex-based  
580 models, does not seem to be the decisive parameter in contrast to the cell area itself.  
581 Particularly, while we do see a slight shift towards lower overall aspect ratios, we do not  
582 observe a clear dependency of the motility of individual cells on the aspect ratio as on the  
583 area. It is important to note that instead of addressing the aspect ratio of individual cells,  
584 current models focus on the properties of monolayers as a bulk. However, as Devany et al.  
585 showed in simulations and experiments that absolute changes of the cell shape can vary  
586 greatly and could thus be inconclusive, depending on the experimental situation.<sup>[53]</sup>

587 Importantly, Saraswathibhatla and Notbohm found a correlation between cell density, shape,  
588 and motility.<sup>[54]</sup> While we only observe small changes in cell shape, we do observe a similar  
589 impact of cell density.  
590 In addition, most studies identifying the cell shape as the predictive parameter for cell motility  
591 worked with other cell types and on longer times scales. Typically, fully polarized cells, such  
592 as airways smooth muscle cells cultivated for several days and up to weeks, were used,  
593 whereas our MDCK II cells only had about 28 h to grow to full (over-)confluence.<sup>[20,25,55]</sup>  
594 Studies working with (ZO protein-inhibited) MDCK or MCF10A lines also cultivated the  
595 cells much longer,<sup>[2,56]</sup> which in conjunction with the observed uncontrolled proliferation  
596 could explain the density-related discrepancies. Furthermore, related studies investigated the  
597 motion of confluent cell layers, whereas we focused on freely migrating epithelia.<sup>[20,25,30,54–56]</sup>

598  
599 An interesting question to be solved will be the emergence mechanism of the two dKD cell  
600 phenotypes, comprising extremely small and contractile as well as large and stretched cells.  
601 To answer this, targeting single cells or cell clusters within a layer with cytoskeletal drugs,  
602 possibly in combination with proliferation inhibition, could be a promising approach in the  
603 future.

604

#### 605 **4. Conclusion**

606 We showed that ZO proteins are not only crucial for barrier function but also for efficient  
607 collective cell migration of epithelial monolayers. Our results draw the following picture of  
608 the impact of ZO1 and 2 protein loss: Due to missing mechanical feedback from ZO1/2, a  
609 thick actomyosin ring builds at the cell periphery that leads to strong contraction of individual  
610 cells, constricting the apical cell cortex and leading to in- or outward bulging. Two cell  
611 phenotypes emerge in ZO1 and 2 depleted cells after a few hours of migration: 1) Small  
612 contractile cells with an apically bulged-out and softened cortex and 2) large, flat cells with an

613 elevated prestress. The larger cells receive a mechanical stimulus from the highly contractile  
614 neighbors and respond by increased proliferation, leading to crowding and, in turn, to even  
615 more small cells. Particularly these small cells are rendered immobile and, together with  
616 additional crowding, lead to partial jamming of the entire layer.

617 We conclude that functioning tight junctions are necessary to maintain fluidity of epithelial  
618 monolayers and thereby guarantee for fast and coherent cell migration.

619

## 620 **5. Material and Methods**

621 *Cell culture:* Madin-Darby Canine Kidney cells (strain II, MDCK II; European Collection of  
622 Authenticated Cell Cultures, Salisbury, UK) were cultured in minimum essential medium  
623 (MEM; Life Technologies, Paisley, UK) containing Earle's salts, 2 mM GlutaMAX<sup>TM</sup>  
624 (ThermoFisher Scientific, Waltham, Massachusetts, USA), 2.2 g/L NaHCO<sub>3</sub>, and 10% fetal  
625 bovine serum (FCS; BioWest, Nuaille, France), called M10F<sup>+</sup> in the following, at 37°C and  
626 5% CO<sub>2</sub> in a humidified incubator. The cells were passaged before reaching confluence two to  
627 three times per week using phosphate buffered saline pH 7.4 (PBS<sup>-</sup>; Biochrom, Berlin,  
628 Germany) containing trypsin/EDTA (0.25%/0.02% w/v; BioWest/Biochrom).

629

630 *Genetic modification of ZO proteins:* ZO knockdowns were effected as described in Beutel et  
631 al.<sup>[40]</sup> To knockdown ZO1 and ZO2 in MDCK II cells, frame-shift mutations were introduced  
632 at the N-termini by CRISPR/Cas9. The following RNA guides (gRNA) were used for ZO1:  
633 ACACACAGTGACGCTTCACA and ZO2: GTACACTGTGACCCTACAAA. Selected  
634 DNA oligos and their trans-encoded RNA (TRCR) were purchased from Integrated DNA  
635 Technologies. Each gRNA was annealed for 1h at room temperature with its TRCR. To  
636 finally generate the riboprotein complex, the gRNA/TRCR complex was incubated with  
637 homemade purified Cas9. Electroporation of each complex was performed in 300,000 cells  
638 (Invitrogen NEON electroporation machine and kit, 2 pulses, 20 ns, 1200 V). Single cells

639 were sorted after 48 h by FACS (fluorescence activated cell sorting) and grown clonally. The  
640 genomic sequence of the genes of interests were sequenced and only clones carrying  
641 homozygous frame-shifts leading to an early stop codon were kept. To generate a combined  
642 ZO1/ZO2 knockdown KD line, we first created a ZO1 knockout and then we targeted ZO2.  
643 The ZO1 KO clone was mutant for two alleles, both alleles have a 1 bp insertion in the guide  
644 region (ACACACAGTGACGCTTC-1 bp insertion-ACAGGG) leading to an early stop of  
645 translation. The ZO2 KD has 5 bp deletion at the end of the guide region  
646 (GTACACTGTGACCCTACA-5 bp deletion-GG) leading to an early stop. Immunostaining  
647 and western-blot analysis showed that ZO1 and ZO2 presented a residual expression level of  
648 the full-length protein equal to 2-3% of the WT line expression level (Beutel et al FigS5).  
649

650 *Cell migration experiments:* For migration experiments Petri dishes with a culture-insert  
651 (Culture-Insert 2 Well in  $\mu$ -Dish 35 mm, ibiTreat #1.5 polymer cover slip; ibidi, Martinsried,  
652 Germany) were used. Cells were seeded at  $4 \cdot 10^5$  cells in 1 mL M10F<sup>-</sup> on the outside of the  
653 insert and grown to (over-) confluence for 28 h ( $\pm$  1.5 h). Upon visual inspection, the insert  
654 was removed, the cells were rinsed with M10F<sup>-</sup>, supplied with sufficient M10F<sup>-</sup> (2-3 mL), and  
655 placed into the incubation system of an inverted optical microscope (BZ-X810; Keyence,  
656 Neu-Isenburg, Germany) equipped with a 10X phase contrast objective (Nikon CFI60 Series;  
657 Keyence). The temperature was calibrated to be 37°C at the cell sample using a local  
658 temperature measurement instrument (Testo 735; Testo, Lenzkirch, Germany), a partial CO<sub>2</sub>  
659 pressure of 5% was chosen, and sufficient humidity was ensured by injecting distilled water  
660 into the incubator appliance. Phase contrast frames were recorded at 1 frame/2.5 min, 14 bit,  
661 25% illumination power, typical exposure times of about 1/25 s, and without zoom, gain, or  
662 binning. Focus tracking was applied and three vertical slices were chosen in a range of 5  $\mu$ m  
663 to avoid drift effects. The cell edge was carefully aligned vertically and set to be at a similar  
664 position for all experiments. Typically, migration was observed overnight for 20-30 h.



665

666 *Mitomycin C treatment:* Mitomycin C (MitoC; Sigma-Aldrich, Steinheim, Germany) was

667 dissolved in DMSO to reach  $500 \mu\text{g mL}^{-1}$  and stored in aliquots of 150  $\mu\text{L}$ .

668 Cell seeding was performed as described above. The samples were rinsed once and then

669 incubated with M10F<sup>-</sup> containing  $10 \mu\text{g mL}^{-1}$  of Mitomycin C at 37°C and 5% CO<sub>2</sub> for 1 h.

670 Then, the insert was removed after about 28 h growth time ( $\pm 1.5$  h). To remove any extruded

671 cells and, most importantly, to prevent the cytotoxic effects of Mytomycin C occurring after

672 12 h of exposure,<sup>[18]</sup> samples were rinsed with 1 mL M10F<sup>-</sup> three times, before the dishes

673 were filled with 2-3 mL M10F<sup>-</sup> and then imaged as described above.

674

675 *Experiments with non-migrating monolayers:*  $5 \cdot 10^5$  cells were seeded in 4mL M10F<sup>-</sup> and

676 placed immediately on the same microscope as above and the same conditions as for the

677 migration experiments were used but without an insert. Four areas per sample were imaged

678 every hour with the same settings as above. Two WT samples, one KO and one dKD sample

679 were recorded. Analysis was performed as described below.

680

681 *Migration data analysis:* First, migration phase contrast movies were down-sampled to

682 1 frame/7.5 min to ensure good PIV (particle image velocimetry) quality. Velocity vector

683 maps were obtained using the Matlab (MathWorks, Natick, USA) -based PIV tool AVeMap

684 from Deforet et al.<sup>[34]</sup> A window size of 32 x 32 pixels corresponding to  $24.16 \mu\text{m} \times 24.16 \mu\text{m}$

685 with an overlap of 0.5 was used, yielding a vector mesh size of 16 pixels ( $12.08 \mu\text{m}$ ). The first

686 row width was set to  $12.08 \mu\text{m}$  and typical mask parameters were 0.60-0.75. The default

687 filters of 1.1 signal-to-noise ratio, 0.3 peak height, and 4 global filtering were used. A PIV

688 quality of  $> 0.8$  was achieved for all data and exemplarily checked by visual inspection. The

689 order parameter was defined as  $\cos \alpha$ , where  $\alpha$  is the angle between the local velocity vector

690 and the normal to the average migration direction. The add-on AVeMap+ was used to analyze

691 the data with respect to the distance from the migration edge. Note, the first two to three data  
692 points are not shown due to a known edge-induced artefact.<sup>[57]</sup>

693 Vector fields were further analyzed using home-written Python scripts. Before correlation  
694 functions were calculated, the leader cell fingers were cut from the vector fields to yield  
695 rectangular input data for the spatial correlation and to avoid edge-induced artifacts.

696 The correlation function was calculated for each time point individually as the 2D spatial  
697 autocorrelation  $AC$  of the velocity vector field using the Scipy function `signal.correlate2d` and  
698 according to Petitjean et al.<sup>[31,58]</sup>

$$699 \quad AC(\vec{r}, t) = \langle v(\vec{r}' + \vec{r}, t) \times v(\vec{r}', t) \rangle$$

700 With the deviation of the  $y$ -component (perpendicular to the migration direction)  $v = v_i -$   
701  $\langle v \rangle$ , which is corrected by the offset  $\langle v \rangle$ , of the vector  $\vec{r}$  at time point  $t$ . The brackets denote  
702 averaging over all vectors. Additionally, the  $AC$  is normalized by its maximum, so that it  
703 starts from one.

704 To gain a one-dimensional function, the 2D correlation function was then radially averaged in  
705 space. The correlation function was finally averaged for each migration movie over time.

706 The correlation length was defined as the integral over the weighted spatial correlation  
707 function  $AC(r)$ :

$$708 \quad \int_0^{\infty} \vec{r} \cdot AC(\vec{r}) d\vec{r}$$

709 To exclude any anti-correlation artifacts ( $AC < 0$ ) at large distances, we only integrated up to  
710 the  $x$ -intercept for all analyses.

711 The amount of leader cells was determined from the phase contrast movies manually. Leader  
712 cells were defined by their position at a protrusion in the front of the leading edge, an  
713 increased cell size compared with bulk cells, and a lamellipodium towards the empty space.

714

715 *Automated cell segmentation:* The deep learning-based cell segmentation algorithm Cellpose  
716 (Stringer et al.<sup>[35]</sup>) was used to extract a mask and an outline for each individual cell body in  
717 an image. The model type was set to *cyto* and the grayscale phase contrast images were used  
718 as input. Before segmentation, the image contrast was auto-corrected using Fiji to facilitate  
719 optimal cell recognition.<sup>[59]</sup> In order to accurately capture all cells in the layer, the flow and  
720 cell probability thresholds were set to 1 and -6, respectively. We found these parameters to be  
721 optimal for our images, because smaller (or larger, respectively) values resulted in missed  
722 cells. No novel model training was necessary. The input diameter was estimated automatically  
723 for every image individually by the software.

724

725 *Cell area, position, and aspect ratio calculation and processing:* For every segmented image,  
726 the masks array and the outlines array were extracted from the returned segmentation  
727 dictionary. The arrays were normalized, so that ones specified cell bodies (or cell outlines)  
728 and zeros empty space, respectively. The outlines were subtracted from the masks to prevent  
729 overlap of cells. The resulting array was converted into the data type uint8 and scaled up to a  
730 value of 255. The array was then subjected to a threshold at a value of 127 and binarized  
731 using the image processing library OpenCV.<sup>[60]</sup> The arrays were then transposed into vectors  
732 of coordinates specifying the outer contour of each cell using the function *findContours* of  
733 OpenCV.<sup>[60]</sup> Only outer contours were extracted and the Teh-Chin chain approximation  
734 algorithm was applied to save memory.<sup>[61]</sup> On the basis of the extracted vectors, the area of  
735 each cell was computed using the function *contourArea* of OpenCV. The moments function  
736 was used to determine the center of each cell, yielding the positions later used by Trackpy.  
737 Cell density was calculated dividing the number of segmented cells by the area occupied by  
738 the monolayer (either the mask obtained from AVeMap or the whole field of view).

739

740 To determine cell aspect ratios (length/width), two approaches were utilized to define the  
741 front-rear (anterior-posterior) axis for each individual cell. First, the `fitEllipse` function of  
742 `OpenCV` was used for every given set of coordinates to compute and fit an ellipse to the 2D  
743 points. Since this function works by fitting the coordinates in a least-squares approach, it was  
744 found that the algorithm seemed to be biased towards high aspect ratios for some cell shapes.  
745 Therefore, the function `minAreaRect` was used to verify the results by calculating a rotated  
746 minimum-area rectangle enclosing the respective set of coordinates. This procedure, however,  
747 seemed to be biased towards low aspect ratios for the aforementioned cell shapes.  
748 Accordingly, we computed the aspect ratio with both algorithms independently and then used  
749 the mean for every cell in each image individually. The validity of this approach was verified  
750 by visual inspection of overlaid input and output images.

751  
752 *Single cell tracking and analysis:* Single cell tracking was performed with the cell positions  
753 calculated before by the `OpenCV` moments function (*vide supra*). `Trackpy` was used to link  
754 the cell positions, yielding individual tracks.<sup>[62,63]</sup> Input data were the segmented phase  
755 contrast time series between 19 and 21 h at a temporal resolution of 1 frame/7.5 min. The link  
756 function was used with a memory of 4 frames and 10 pixels as maximal displacement. The  
757 resulting trajectories were filtered, so that only the ones that persisted for at least 5 frames  
758 were kept, to avoid spurious trajectories. No drift correction was necessary.

759 Mean-square-displacements (*MSDs*) were calculated using the ensemble *MSD* function of  
760 `Trackpy` as:

$$761 \quad MSD(\tau) = \langle (x(t + \tau) - x(t))^2 \rangle$$

762 The brackets denote averaging over time and over all cells. Before calculation and fitting of  
763 the *MSDs*, the trajectories were filtered by discrete bins of 100  $\mu\text{m}^2$  cell area (see Figure 2 and  
764 3) or 0.25 aspect ratio (see Figure S1 and S2). *MSDs* were fitted by a power law of the form

765  $MSD(\tau) = a \tau^n$  with a power law exponent  $n$  and an offset  $a$  using a linear regression in  
766 logarithmic space implemented in Trackpy.

767

768 *AFM-based force spectroscopy*: Force spectroscopic indentation measurements were carried  
769 out with a NanoWizard 4 (JPK Instruments, Berlin, Germany) mounted on an inverted  
770 microscope (IX 81; Olympus, Tokyo, Japan) using silicon nitride cantilevers with a nominal  
771 spring constant of  $0.01 \text{ N m}^{-1}$  (MLCT C; Bruker AFM Probes, Camarillo, USA). Before an  
772 experiment, cantilevers were rinsed with isopropanol and PBS<sup>-</sup> as well as incubated with  
773 FITC-conjugated Concanavalin A solution ( $2.5 \text{ mg mL}^{-1}$  in PBS<sup>-</sup>; Sigma-Aldrich) for 1 h.  
774 The sensitivity of the AFM was determined by recording force curves in the empty space  
775 without cells and the exact spring constant of each cantilever was determined by the thermal  
776 noise method.<sup>[64]</sup> Approximately 20 h after removing the insert (*vide supra*), cells were rinsed  
777 three times with M10F<sup>-</sup> containing  $0.2 \text{ mg mL}^{-1}$  Penicillin (Biochrom),  $0.2 \text{ mg mL}^{-1}$   
778 Streptomycin (Biochrom), and 15 mM HEPES (M10F<sup>+</sup>; BioWest).

779 For the measurements, samples were mounted on the AFM stage, 2.5 mL M10F<sup>+</sup> was  
780 supplied, and the heater (JPK Instruments) was set to 37°C. The cells were indented at a  
781 constant speed of  $2 \mu\text{m s}^{-1}$  to maximum force of 1 nN. After a dwell time of 0.5 s at constant  
782 height the indenter was retracted at the same speed. Force maps of 25 pixels x 25 pixels in an  
783 area of  $50 \mu\text{m} \times 50 \mu\text{m}$  were recorded by lateral scanning across the sample recording one  
784 force indentation cycle at each pixel. Additionally, five consecutive force curves in the center  
785 of individual cells in the monolayer were acquired using the same parameters.

786

787 *Force curve analysis and mechanical model*: Generally, force-relaxation curves were  
788 recorded as detailed previously.<sup>[41]</sup> After indentation of the center of the cell with a velocity of  
789  $2 \mu\text{m s}^{-1}$  to avoid artefacts from hydrodynamic drag acting on the cantilever, we switched off  
790 the constant force feedback loop and kept the system at constant height. During this time the

791 decrease of cantilever deflection is monitored as a function of time (for 0.5 s). We used the  
792 same MLCT-C cantilevers as for imaging (*vide infra*). The curves were modeled using a  
793 theory introduced recently.<sup>[41,65]</sup> Briefly, the surfaces of the confluent MDCK II cells are  
794 described as capped cylinders. The average geometry as derived from AFM imaging was  
795 employed to describe the apical cap of the deformed cells in terms of contact angle and radius  
796 of the basis. Generally, we consider the cell as a liquid-filled object surrounded by an  
797 isotropic viscoelastic shell deformed at constant volume. The force  $F$  acting on the apex of the  
798 cell is given by:

799

$$800 \quad F = 2\pi \left( R_1^2 \left( \frac{R_1 \sin \phi + r_1 \sin \theta}{R_1^2 r_1^2} \right) - R_1 \sin \phi \right) T(t)$$

801

802 with  $R_1$ , the radius at the base of the spherical cap and  $\phi$  the contact angle in response to  
803 deformation.  $r_1$  is the contact radius with the conical indenter,  $\theta = \frac{\pi}{2} - \vartheta$  with  $\vartheta$ , the cone half  
804 angle.

805 Viscoelasticity of the shell enters the tension term  $T(t)$  through a time dependent area  
806 compressibility modulus  $K_A = K_A^0 (t/t_0)^{-\beta}$ . Now we need to solve a set of nonlinear  
807 equations for the shape of the deformed cell to fulfill force balances and the constant volume  
808 boundary condition. The resulting shapes are minimal surfaces to minimize the stretching  
809 energy. Membrane tension  $T_t$  was calculated from the tether rupture force  $F_t$  at the end of the  
810 retraction curve via  $T_t = \frac{F_t^2}{8\pi^2 \kappa}$  with the bending modulus  $\kappa = 2.7 \cdot 10^{-19}$  J.<sup>[66-68]</sup>

811 Analysis was performed using self-written Python and Matlab scripts in combination with the  
812 JPK SPM Data Processing (JPK Instruments / Bruker) software. The baseline was corrected  
813 by a linear fit before contact. The contact point was determined individually using the JPK  
814 SPM Data Processing. Tether forces were acquired with the same software.

815

816 *AFM imaging:* Approximately 20 h after removing the insert (*vide supra*), cells were rinsed  
817 three times with PBS containing  $0.1 \text{ g L}^{-1} \text{ Mg}^{2+}$  and  $0.133 \text{ g L}^{-1} \text{ Ca}^{2+}$  (PBS<sup>++</sup>; Sigma-Aldrich)  
818 and incubated with glutaraldehyde solution (2.5% (v/v) in PBS<sup>++</sup>) for 20 min. PBS<sup>++</sup> was used  
819 instead of PBS without magnesium and calcium ions, because the dKD and KO cells were  
820 more prone to dissolution of ion-dependent adhesions due to the missing diffusion barrier  
821 function. Before imaging, the samples were rinsed again three times to remove residual GDA.  
822 Cell imaging was performed using a NanoWizard III (JPK Instruments) mounted on an  
823 inverted optical microscope (IX 81; Olympus) to enable additional visual inspection via phase  
824 contrast. Imaging was carried out as described in Brückner et al.<sup>[43]</sup> in contact mode using  
825 MLCT C cantilevers (Bruker AFM Probes) in PBS<sup>++</sup> with typical line scan rates of about  
826 0.3 Hz and typical forces of 0.1 nN. Height and error images were obtained using the JPK  
827 SPM Data Processing software provided by the manufacturer.

828

829 *Cell labeling and fluorescence microscopy:* Prior to cell labeling, cells were fixed by  
830 incubation with paraformaldehyde/glutaraldehyde solution (4% (w/v)/0.1% (w/v) in PBS<sup>++</sup>;  
831 Science Services, Munich, Germany/Sigma-Aldrich) for 20 min. To permeabilize the cellular  
832 plasma membrane, samples were incubated with 0.1% (v/v) Triton X-100 in PBS<sup>-</sup> for 5 min.  
833 After three rinsing steps with 1 mL PBS<sup>++</sup> each, to block unspecific binding sites, cells were  
834 incubated with blocking/dilution buffer (PBS<sup>-</sup> containing 2% (w/v) bovine serum albumin and  
835 0.1% (v/v) Tween20) for 30 min.

836 For ZO1 staining, a fluorophore-conjugated primary antibody (mouse ZO1-1A12 IgG1  
837 AlexaFluor 488; Invitrogen, ThermoFisher Scientific, Waltham, Massachusetts, USA) was  
838 diluted with blocking/dilution buffer to a concentration of  $5 \mu\text{g mL}^{-1}$  and cells were incubated  
839 for 1 h. For all other proteins, the following primary antibodies were diluted in  
840 blocking/dilution buffer.

841 ZO2: 1  $\mu\text{g mL}^{-1}$  Clone 3E8D9 mouse IgG1; Invitrogen. Phospho-Myosin: 1:200 light chain 2  
842 (Ser 19) rabbit IgG1; Cell Signaling Technology, Danvers, Massachusetts, USA. *E-Cadherin*:  
843 1:50 Clone 36 mouse IgG1; BD Biosciences, Heidelberg, Germany.  *$\beta$ -catenin*: 5  $\mu\text{g mL}^{-1}$   
844 mouse IgG1; BD Biosciences. *Occludin*: 6.5  $\mu\text{g mL}^{-1}$  EPR20992 rabbit IgG; Abcam,  
845 Cambridge, UK. Claudin 1: 11.6  $\mu\text{g mL}^{-1}$  rabbit IgG; Abcam.

846 After the primary antibody, cells were rinsed briefly with PBS<sup>++</sup>, and then washed with  
847 PBS<sup>++</sup>, with 0.1% (v/v) Triton X-100 in PBS<sup>-</sup> and again with PBS<sup>++</sup> for 5 min each on a  
848 shaker plate (75 rpm). The secondary antibody (AlexaFluor 488- or AlexaFluor 546-  
849 conjugated goat anti-mouse or anti-rabbit IgG; Life Technologies, Carlsbad, USA) was  
850 diluted with blocking/dilution buffer to a concentration of 5  $\mu\text{g mL}^{-1}$ . The cells were  
851 incubated for 1 h. Actin labeling was performed using AlexaFluor 488- or AlexaFluor 546-  
852 phalloidin (Invitrogen), diluted together with the secondary antibody in blocking/dilution  
853 buffer to a concentration of 165 nM. Incubation time: 45 min. Following the secondary  
854 antibody, samples were washed with PBS<sup>++</sup> for 5 min each on a shaker plate (75 rpm).

855 Nucleus staining was performed by incubation with Hoechst 33342 (Invitrogen), diluted to  
856 1  $\mu\text{g mL}^{-1}$ , for 15 min. For imaging, samples were rinsed three times with PBS<sup>++</sup> and kept in  
857 PBS<sup>++</sup>. All labeling steps were performed at room temperature.

858 A confocal laser scanning microscope (FluoView1200; Olympus, Tokyo, Japan), equipped  
859 with a 60X oil immersion objective ( $NA = 1.25$ ), was used for fluorescence imaging. Image  
860 processing, brightness adjustment, and analysis was performed using Fiji.<sup>[59]</sup>

861

862 *Statistical analyses*: The data were tested for normality using the Shapiro-Wilk test. Because  
863 for none of the migration-related data the null hypothesis of a normal distribution was rejected  
864 (at the  $p < 0.05$  level), significance was tested using Welch's t-test. The Mann-Whitney U test  
865 was applied to the AFM data to accommodate non-normality. All statistical analyses were  
866 performed in Python.



867 A  $p$ -value of  $< 0.05$  was considered significant and denoted by one asterisk (\*),  $p < 0.01$  and  
868  $p < 0.001$  we indicated by two (\*\*) and three (\*\*\*) asterisks, respectively.

869

## 870 **Supporting Information**

871 Supporting Information is available at the end of this document.

872

## 873 **Acknowledgements**

874 Funding by the DFG though grants SPP1782 and DFG JA963 is gratefully acknowledged.

875 We thank Jonathan F.E. Bodenschatz for technical assistance and discussions. We would also  
876 like to acknowledge Filip Savić, for his help with the PIV analyses and Burkhard Geil for the  
877 helpful discussions about the segmentation and tracking.

878 M.S., H.P., M.F., J.G., and A.R. executed measurements and performed analyses. M.S.

879 designed and planned the experiments. R.M. and A.H. carried out the genetic modifications.

880 T.O., A.H., and A.J. designed and supervised the research. M.S. and A.J. wrote the

881 manuscript. All authors helped with discussions and proofreading.

882

## 883 **References**

- 884 [1] G. Hatte, C. Prigent, J.-P. Tassan, *J Cell Sci* **2018**, *131*, DOI 10.1242/jcs.208736.  
885 [2] A. X. Cartagena-Rivera, C. M. V. Itallie, J. M. Anderson, R. S. Chadwick, *Nat Commun* **2017**, *8*,  
886 1.  
887 [3] D. Spadaro, S. Le, T. Laroche, I. Mean, L. Jond, J. Yan, S. Citi, *Current Biology* **2017**, *27*, 3783.  
888 [4] W. Choi, B. R. Acharya, G. Peyret, M.-A. Fardin, R.-M. Mège, B. Ladoux, A. S. Yap, A. S.  
889 Fanning, M. Peifer, *J Cell Biol* **2016**, *213*, 243.  
890 [5] O. Tornavaca, M. Chia, N. Dufton, L. O. Almagro, D. E. Conway, A. M. Randi, M. A. Schwartz,  
891 K. Matter, M. S. Balda, *J Cell Biol* **2015**, *208*, 821.  
892 [6] S. Citi, *Biophysical Reviews* **2019**, DOI 10.1007/s12551-019-00582-7.  
893 [7] M. A. Odenwald, W. Choi, W.-T. Kuo, G. Singh, A. Sailer, Y. Wang, L. Shen, A. S. Fanning, J.  
894 R. Turner, *Journal of Biological Chemistry* **2018**, *293*, 17317.  
895 [8] M. A. Odenwald, W. Choi, A. Buckley, N. Shashikanth, N. E. Joseph, Y. Wang, M. H. Warren,  
896 M. M. Buschmann, R. Pavlyuk, J. Hildebrand, B. Margolis, A. S. Fanning, J. R. Turner, *J Cell Sci*  
897 **2017**, *130*, 243.  
898 [9] A. S. Fanning, B. J. Jameson, L. A. Jesaitis, J. M. Anderson, *J Biol Chem* **1998**, *273*, 29745.  
899 [10] A. S. Fanning, C. M. Van Itallie, J. M. Anderson, *MBoC* **2011**, *23*, 577.  
900 [11] S. Tokuda, T. Higashi, M. Furuse, *PLoS ONE* **2014**, *9*, e104994.

- 901 [12]S. Jain, V. M. L. Cachoux, G. H. N. S. Narayana, S. de Beco, J. D'Alessandro, V. Cellerin, T.  
902 Chen, M. L. Heuzé, P. Marcq, R.-M. Mège, A. J. Kabla, C. T. Lim, B. Ladoux, *Nature Physics*  
903 **2020**, DOI 10.1038/s41567-020-0875-z.
- 904 [13]R. Sunyer, V. Conte, J. Escribano, A. Elosegui-Artola, A. Labernadie, L. Valon, D. Navajas, J. M.  
905 Garcia-Aznar, J. J. Munoz, P. Roca-Cusachs, X. Trepata, *Science* **2016**, *353*, 1157.
- 906 [14]M. Reffay, M. C. Parrini, O. Cochet-Escartin, B. Ladoux, A. Buguin, S. Coscoy, F. Amblard, J.  
907 Camonis, P. Silberzan, *Nature Cell Biology* **2014**, *16*, 217.
- 908 [15]E. Anon, X. Serra-Picamal, P. Hersen, N. C. Gauthier, M. P. Sheetz, X. Trepata, B. Ladoux,  
909 *Proceedings of the National Academy of Sciences* **2012**, *109*, 10891.
- 910 [16]X. Trepata, M. R. Wasserman, T. E. Angelini, E. Millet, D. A. Weitz, J. P. Butler, J. J. Fredberg,  
911 *Nature Physics* **2009**, *5*, 426.
- 912 [17]M. Poujade, E. Grasland-Mongrain, A. Hertzog, J. Jouanneau, P. Chavrier, B. Ladoux, A. Buguin,  
913 P. Silberzan, *Proceedings of the National Academy of Sciences* **2007**, *104*, 15988.
- 914 [18]E. Gauquelin, S. Tlili, C. Gay, G. Peyret, R.-M. Mège, M. A. Fardin, B. Ladoux, *Soft Matter*  
915 **2019**, *15*, 2798.
- 916 [19]L. Atia, D. Bi, Y. Sharma, J. A. Mitchel, B. Gweon, S. A. Koehler, S. J. DeCamp, B. Lan, J. H.  
917 Kim, R. Hirsch, A. F. Pegoraro, K. H. Lee, J. R. Starr, D. A. Weitz, A. C. Martin, J.-A. Park, J. P.  
918 Butler, J. J. Fredberg, *Nature Physics* **2018**, *14*, 613.
- 919 [20]S. Tlili, E. Gauquelin, B. Li, O. Cardoso, B. Ladoux, H. Delanoë-Ayari, F. Graner, *Royal Society*  
920 *Open Science* **2018**, *5*, 172421.
- 921 [21]C. Malinverno, S. Corallino, F. Giavazzi, M. Bergert, Q. Li, M. Leoni, A. Disanza, E. Frittoli, A.  
922 Oldani, E. Martini, T. Lendenmann, G. Deflorian, G. V. Beznoussenko, D. Poulidakos, K. H.  
923 Ong, M. Uroz, X. Trepata, D. Parazzoli, P. Maiuri, W. Yu, A. Ferrari, R. Cerbino, G. Scita, *Nature*  
924 *Materials* **2017**, *16*, 587.
- 925 [22]D. Bi, X. Yang, M. C. Marchetti, M. L. Manning, *Physical Review X* **2016**, *6*, DOI  
926 10.1103/PhysRevX.6.021011.
- 927 [23]J. Notbohm, S. Banerjee, K. J. C. Utuje, B. Gweon, H. Jang, Y. Park, J. Shin, J. P. Butler, J. J.  
928 Fredberg, M. C. Marchetti, *Biophys. J.* **2016**, *110*, 2729.
- 929 [24]J.-A. Park, J. H. Kim, D. Bi, J. A. Mitchel, N. T. Qazvini, K. Tantisira, C. Y. Park, M. McGill, S.-  
930 H. Kim, B. Gweon, J. Notbohm, R. Steward Jr, S. Burger, S. H. Randell, A. T. Kho, D. T. Tambe,  
931 C. Hardin, S. A. Shore, E. Israel, D. A. Weitz, D. J. Tschumperlin, E. P. Henske, S. T. Weiss, M.  
932 L. Manning, J. P. Butler, J. M. Drazen, J. J. Fredberg, *Nature Materials* **2015**, *14*, 1040.
- 933 [25]S. Garcia, E. Hannezo, J. Elgeti, J.-F. Joanny, P. Silberzan, N. S. Gov, *PNAS* **2015**, *112*, 15314.
- 934 [26]E. Bazellieres, V. Conte, A. Elosegui-Artola, X. Serra-Picamal, M. Bintanel-Morcillo, P. Roca-  
935 Cusachs, J. J. Muñoz, M. Sales-Pardo, R. Guimerà, X. Trepata, *Nature Cell Biology* **2015**, *17*, 409.
- 936 [27]M. Sadati, N. Taheri Qazvini, R. Krishnan, C. Y. Park, J. J. Fredberg, *Differentiation* **2013**, *86*,  
937 121.
- 938 [28]D. T. Tambe, C. Corey Hardin, T. E. Angelini, K. Rajendran, C. Y. Park, X. Serra-Picamal, E. H.  
939 Zhou, M. H. Zaman, J. P. Butler, D. A. Weitz, J. J. Fredberg, X. Trepata, *Nature Materials* **2011**,  
940 *10*, 469.
- 941 [29]T. E. Angelini, E. Hannezo, X. Trepata, M. Marquez, J. J. Fredberg, D. A. Weitz, *Proceedings of*  
942 *the National Academy of Sciences* **2011**, *108*, 4714.
- 943 [30]L. Petitjean, M. Reffay, E. Grasland-Mongrain, M. Poujade, B. Ladoux, A. Buguin, P. Silberzan,  
944 *Biophysical Journal* **2010**, *98*, 1790.
- 945 [31]D. Du, F. Xu, L. Yu, C. Zhang, X. Lu, H. Yuan, Q. Huang, F. Zhang, H. Bao, L. Jia, X. Wu, X.  
946 Zhu, X. Zhang, Z. Zhang, Z. Chen, *Developmental Cell* **2010**, *18*, 52.
- 947 [32]A. Raya-Sandino, A. Castillo-Kauil, A. Domínguez-Calderón, L. Alarcón, D. Flores-Benitez, F.  
948 Cuellar-Perez, B. López-Bayghen, B. Chávez-Munguía, J. Vázquez-Prado, L. González-Mariscal,  
949 *Biochimica et Biophysica Acta (BBA) - Molecular Cell Research* **2017**, *1864*, 1714.
- 950 [33]M. Deforet, M. C. Parrini, L. Petitjean, M. Biondini, A. Buguin, J. Camonis, P. Silberzan, *Nature*  
951 *Methods* **2012**, *9*, 1081.
- 952 [34]C. Stringer, T. Wang, M. Michaelos, M. Pachitariu, *Nature Methods* **2020**, *1*.
- 953 [35]S. Henkes, Y. Fily, M. C. Marchetti, *Physical Review E* **2011**, *84*, DOI  
954 10.1103/PhysRevE.84.040301.

- 955 [36]M. L. Heuzé, G. H. N. Sankara Narayana, J. D'Alessandro, V. Cellerin, T. Dang, D. S. Williams,  
956 J. C. Van Hest, P. Marcq, R.-M. Mège, B. Ladoux, *eLife* **2019**, *8*, e46599.
- 957 [37]W. Xi, S. Sonam, T. Beng Saw, B. Ladoux, C. Teck Lim, *Nat Commun* **2017**, *8*, DOI  
958 10.1038/s41467-017-01390-x.
- 959 [38]V. N. Iyer, W. Szybalski, *Proc Natl Acad Sci U S A* **1963**, *50*, 355.
- 960 [39]O. Beutel, R. Maraschini, K. Pombo-García, C. Martin-Lemaitre, A. Honigmann, *Cell* **2019**, *179*,  
961 923.
- 962 [40]A. Cordes, H. Witt, A. Gallemí-Pérez, B. Brückner, F. Grimm, M. Vache, T. Oswald, J.  
963 Bodenschatz, D. Flormann, F. Lautenschläger, M. Tarantola, A. Janshoff, *Phys. Rev. Lett.* **2020**,  
964 *125*, 068101.
- 965 [41]C. Guillot, T. Lecuit, *Science* **2013**, *340*, 1185.
- 966 [42]B. R. Brückner, H. Nöding, M. Skamrahl, A. Janshoff, *Progress in Biophysics and Molecular*  
967 *Biology* **2019**, *144*, 77.
- 968 [43]M. Skamrahl, H. Colin-York, L. Barbieri, M. Fritzsche, *Small* **2019**, *15*, 1902202.
- 969 [44]C. Zihni, M. S. Balda, K. Matter, *J Cell Sci* **2014**, *127*, 3401.
- 970 [45]L. González-Mariscal, R. Tapia, D. Chamorro, *Biochimica et Biophysica Acta (BBA) -*  
971 *Biomembranes* **2008**, *1778*, 729.
- 972 [46]T. Sourisseau, A. Georgiadis, A. Tsapara, R. R. Ali, R. Pestell, K. Matter, M. S. Balda, *Molecular*  
973 *and Cellular Biology* **2006**, *26*, 2387.
- 974 [47]C. T. Capaldo, S. Koch, M. Kwon, O. Laur, C. A. Parkos, A. Nusrat, *MBoC* **2011**, *22*, 1677.
- 975 [48]S. Gudipaty, J. Lindblom, P. Loftus, M. Redd, K. Edes, C. Davey, V. Krishnegowda, J.  
976 Rosenblatt, *Nature* **2017**, *543*, 118.
- 977 [49]C. Fedele, E. Mäntylä, B. Belardi, T. Hamkins-Indik, S. Cavalli, P. A. Netti, D. A. Fletcher, S.  
978 Nymark, A. Priimagi, T. O. Ihalainen, *Scientific Reports* **2020**, *10*, 15329.
- 979 [50]M. Vishwakarma, J. Di Russo, D. Probst, U. S. Schwarz, T. Das, J. P. Spatz, *Nature*  
980 *Communications* **2018**, *9*, DOI 10.1038/s41467-018-05927-6.
- 981 [51]S. Rausch, T. Das, J. R. Soiné, T. W. Hofmann, C. H. Boehm, U. S. Schwarz, H. Boehm, J. P.  
982 Spatz, *Biointerphases* **2013**, *8*, 32.
- 983 [52]J. Devany, D. M. Sussman, M. L. Manning, M. L. Gardel, *bioRxiv* **2020**, 804294.
- 984 [53]A. Saraswathibhatla, J. Notbohm, *Physical Review X* **2020**, *10*, DOI  
985 10.1103/PhysRevX.10.011016.
- 986 [54]J. A. Mitchel, A. Das, M. J. O'Sullivan, I. T. Stancil, S. J. DeCamp, S. Koehler, J. P. Butler, J. J.  
987 Fredberg, M. A. Nieto, D. Bi, J.-A. Park, *bioRxiv* **2019**, DOI 10.1101/665018.
- 988 [55]J. H. Kim, A. F. Pegoraro, A. Das, S. A. Koehler, S. A. Ujwary, B. Lan, J. A. Mitchel, L. Atia, S.  
989 He, K. Wang, D. Bi, M. H. Zaman, J.-A. Park, J. P. Butler, K. H. Lee, J. R. Starr, J. J. Fredberg,  
990 *Biochemical and Biophysical Research Communications* **2020**, *521*, 706.
- 991 [56]X. Serra-Picamal, V. Conte, R. Vincent, E. Anon, D. T. Tambe, E. Bazellieres, J. P. Butler, J. J.  
992 Fredberg, X. Trepac, *Nature Physics* **2012**, *8*, 628.
- 993 [57]P. Virtanen, R. Gommers, T. E. Oliphant, M. Haberland, T. Reddy, D. Cournapeau, E. Burovski,  
994 P. Peterson, W. Weckesser, J. Bright, S. J. van der Walt, M. Brett, J. Wilson, K. J. Millman, N.  
995 Mayorov, A. R. J. Nelson, E. Jones, R. Kern, E. Larson, C. J. Carey, Í. Polat, Y. Feng, E. W.  
996 Moore, J. VanderPlas, D. Laxalde, J. Perktold, R. Cimrman, I. Henriksen, E. A. Quintero, C. R.  
997 Harris, A. M. Archibald, A. H. Ribeiro, F. Pedregosa, P. van Mulbregt, *Nature Methods* **2020**, *17*,  
998 261.
- 999 [58]J. Schindelin, I. Arganda-Carreras, E. Frise, V. Kaynig, M. Longair, T. Pietzsch, S. Preibisch, C.  
1000 Rueden, S. Saalfeld, B. Schmid, J.-Y. Tinevez, D. J. White, V. Hartenstein, K. Eliceiri, P.  
1001 Tomancak, A. Cardona, *Nature Methods* **2012**, *9*, 676.
- 1002 [59]G. BRADSKI, *Dr Dobb's J. Software Tools* **2000**, *25*, 120.
- 1003 [60]C.- Teh, R. T. Chin, *IEEE Transactions on Pattern Analysis and Machine Intelligence* **1989**, *11*,  
1004 859.
- 1005 [61]Dan Allan, Casper van der Wel, Nathan Keim, Thomas A Caswell, Devin Wieker, Ruben  
1006 Verweij, Chaz Reid, Thierry, Lars Grueter, Kieran Ramos, apiszcz, zoeith, Rebecca W Perry,  
1007 François Boulogne, Prashant Sinha, pfigliozzi, Nicolas Bruot, Leonardo Uieda, Jan Katins,  
1008 Hadrien Mary, Aron Ahmadi, *Soft-Matter/Trackpy: Trackpy v0.4.2*, Zenodo, **2019**.
- 1009 [62]J. C. Crocker, D. G. Grier, *Journal of Colloid and Interface Science* **1996**, *179*, 298.

- 1010 [63]J. L. Hutter, J. Bechhoefer, *Review of Scientific Instruments* **1993**, *64*, 1868.  
1011 [64]H. Hubrich, I. P. Mey, B. R. Brückner, P. Mühlenbrock, S. Nehls, L. Grabenhorst, T. Oswald, C.  
1012 Steinem, A. Janshoff, *Nano Letters* **2020**, DOI 10.1021/acs.nanolett.0c01769.  
1013 [65]J. Dai, M. P. Sheetz, *Biophysical Journal* **1999**, *77*, 3363.  
1014 [66]F. Brochard-Wyart, N. Borghi, D. Cuvelier, P. Nassoy, *PNAS* **2006**, *103*, 7660.  
1015 [67]A. Pietuch, B. R. Brückner, T. Fine, I. Mey, A. Janshoff, *Soft Matter* **2013**, *9*, 11490.  
1016

1017 In this article it is shown that tight junction ZO proteins maintain epithelial cell sheet fluidity  
1018 and thereby ensure efficient and coherent migration. Cells lacking these proteins lose  
1019 viscoelastic tissue integrity due to actomyosin remodeling and increase proliferation, which  
1020 induces cellular crowding. Particularly, upon ZO protein loss small cells at high cell densities  
1021 eventually impair migration and cause jamming.

1022

1023 *Mark Skamrahl, Hongtao Pang, Maximilian Ferle, Jannis Gottwald, Angela Rübeling, Riccardo*  
1024 *Maraspini, Alf Honigmann, Tabea A. Oswald\*, and Andreas Janshoff\**

1025

1026 **Tight junction ZO proteins maintain tissue fluidity, ensuring efficient collective cell**  
1027 **migration**

1028

1029

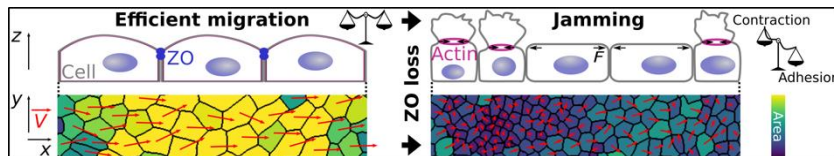

1030

1031

1032

*ToC figure*

1033 Supporting Information

1034

1035

1036 **Tight junction ZO proteins maintain tissue fluidity, ensuring efficient collective cell**  
1037 **migration**

1038

1039 *Mark Skamrahl, Hongtao Pang, Maximilian Ferle, Jannis Gottwald, Angela Rübeling, Riccardo*

1040 *Maraspini, Alf Honigmann, Tabea A. Oswald\*, and Andreas Janshoff\**

1041

1042

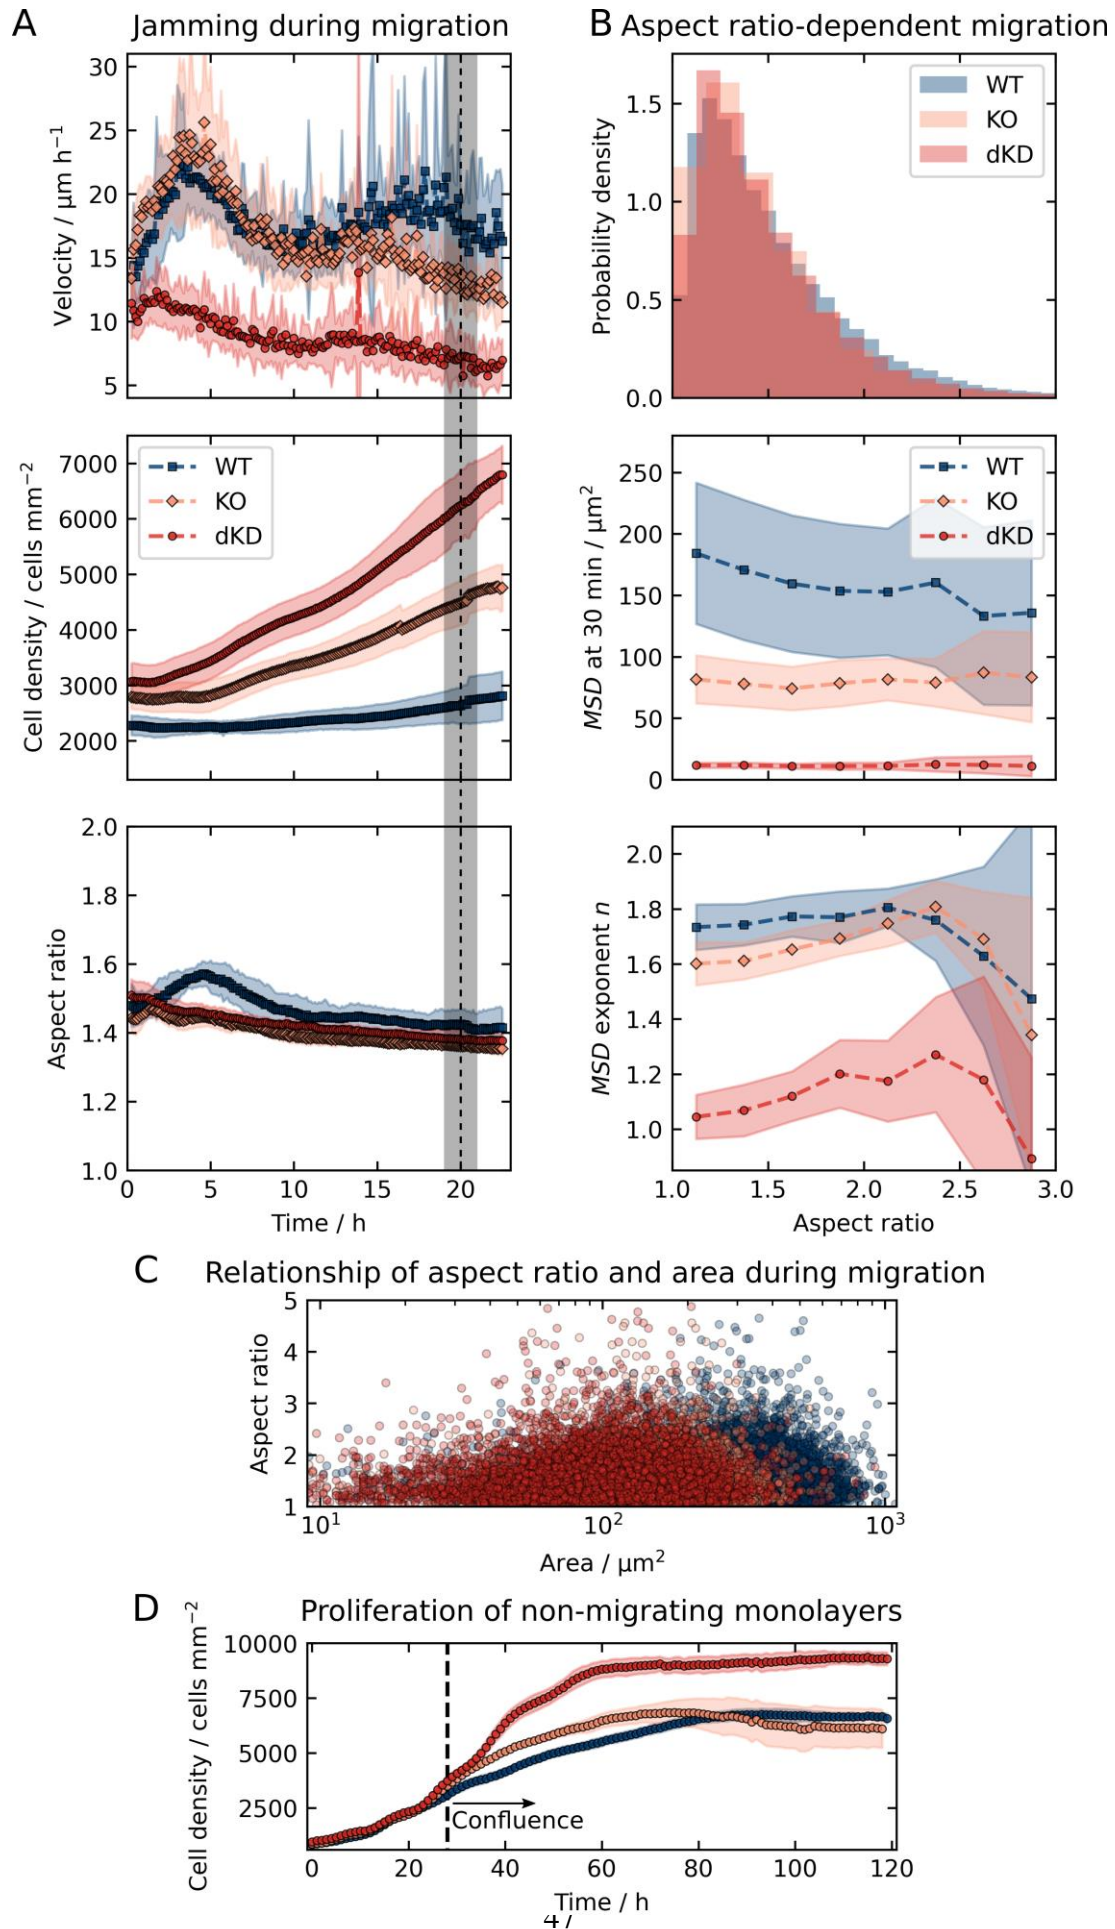

1043 **Figure S1.** Temporal evolution of cell density, velocity, and aspect ratio as well as aspect  
1044 ratio-dependent motility of all three untreated MDCK II cell lines. A) Cell crowding and  
1045 jamming during migration as quantified by the velocity, cell density, and aspect ratio over  
1046 time. The gray shade at 19-21 h corresponds to the time window of the *MSD* analyses. B)  
1047 Aspect ratio distribution and aspect ratio-dependent *MSD* parameters. C) The aspect ratio  
1048 showed a high variance but no co-variation with the area. D) Additional proliferation  
1049 experiment immediately after seeding of cells without insert. The dashed line indicates  
1050 reaching of confluence at 28 h, corresponding to the beginning of our typical migration  
1051 experiments (0 h in all other figures). Means and standard deviations are shown. The aspect  
1052 ratio in A is the median for each experiment and then averaged over all experiments.  
1053



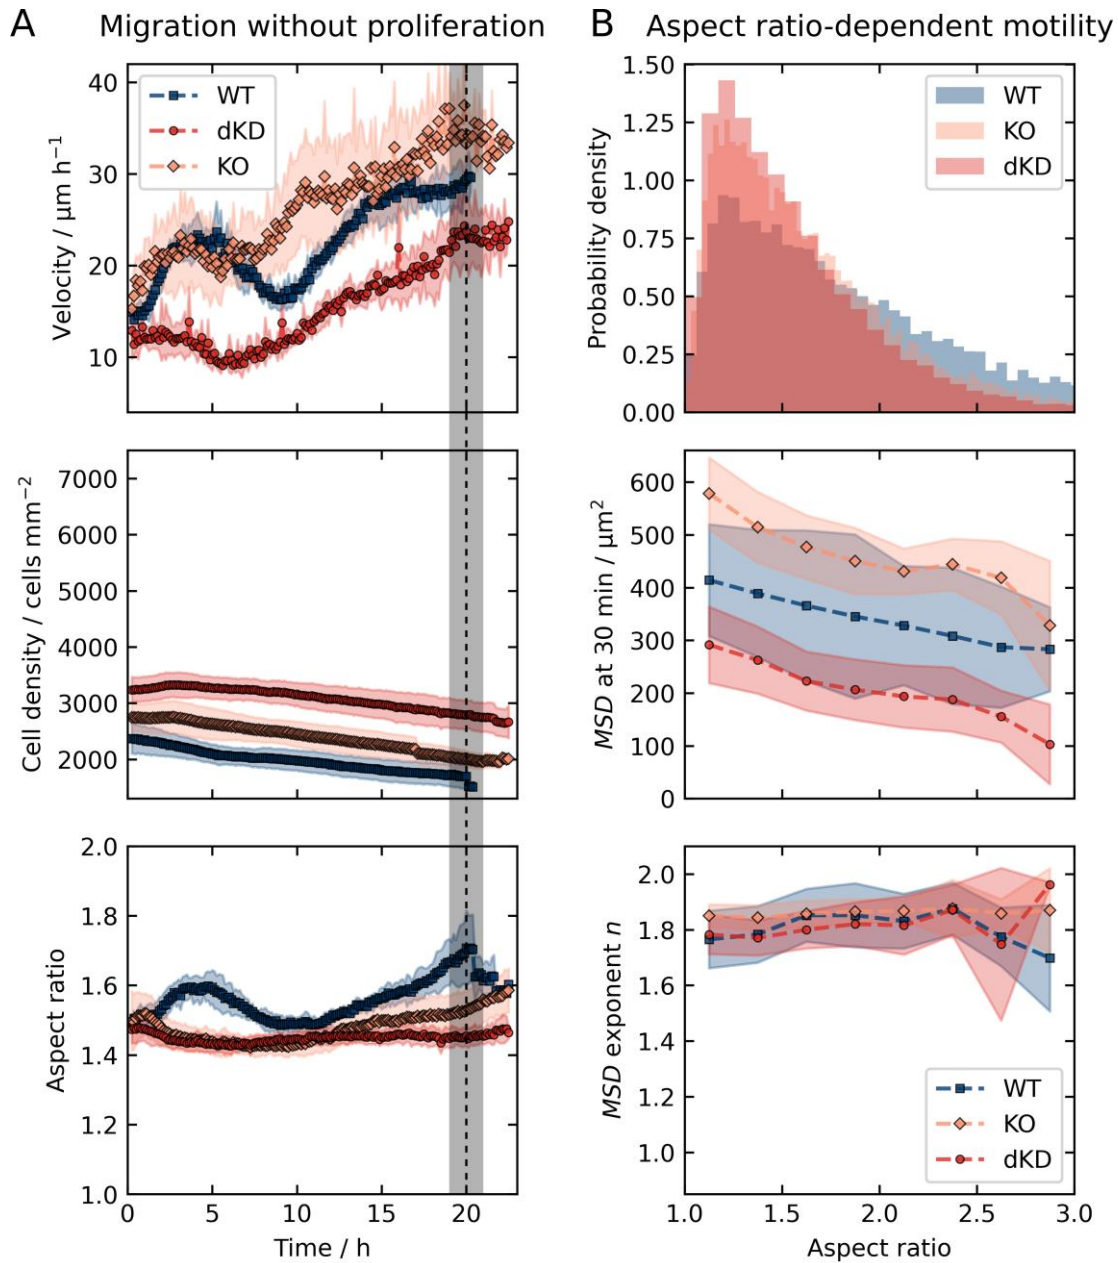

1054 **Figure S2.** Temporal evolution of cell density, velocity, and aspect ratio as well as aspect  
 1055 ratio-dependent motility of all three MDCK II cell lines upon proliferation inhibition by  
 1056 Mitomycin C. A) Cell crowding and jamming were prevented by proliferation inhibition  
 1057 during migration as quantified by the velocity, cell density, and aspect ratio over time. The  
 1058 gray shade at 19-21 h corresponds to the time window of the *MSD* analyses. B) Aspect ratio  
 1059 distribution and aspect ratio-dependent *MSD* parameters. Means and standard deviations are  
 1060 shown. The aspect ratio in A is the median for each experiment and then averaged over all  
 1061 experiments.  
 1062

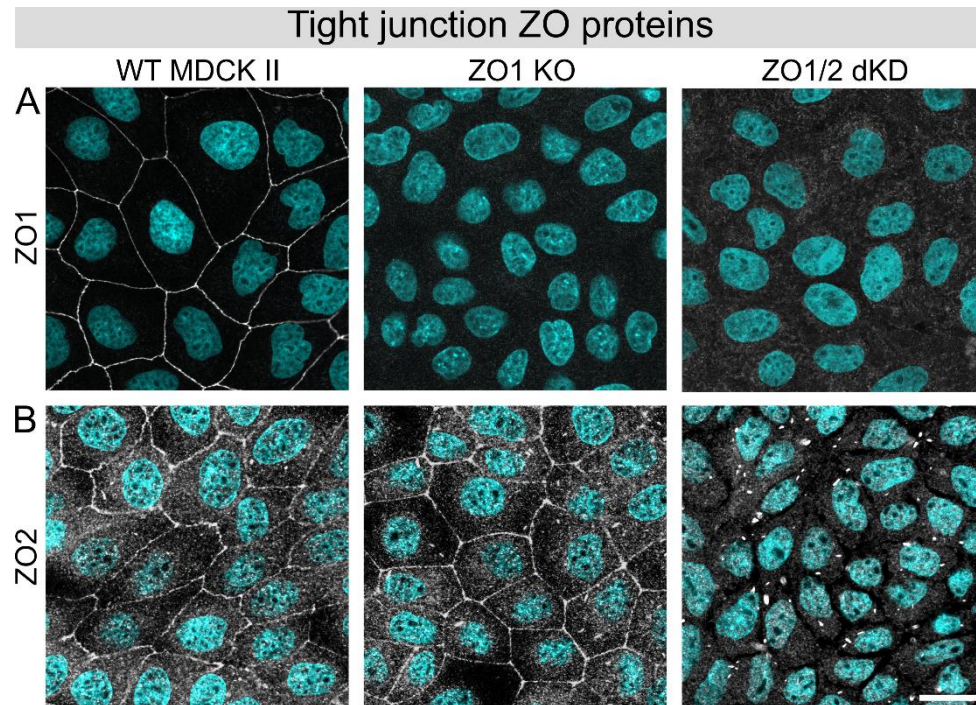

1063 **Figure S3.** Immunofluorescence measurements confirming successful ZO protein knockout/-

1064 down. A) ZO1 antibody-based staining of all three MDCK II cell lines. B) ZO2 antibody-

1065 based staining of all three MDCK II lines. Nuclei are shown in cyan. Scale bar: 20  $\mu$ m.

1066

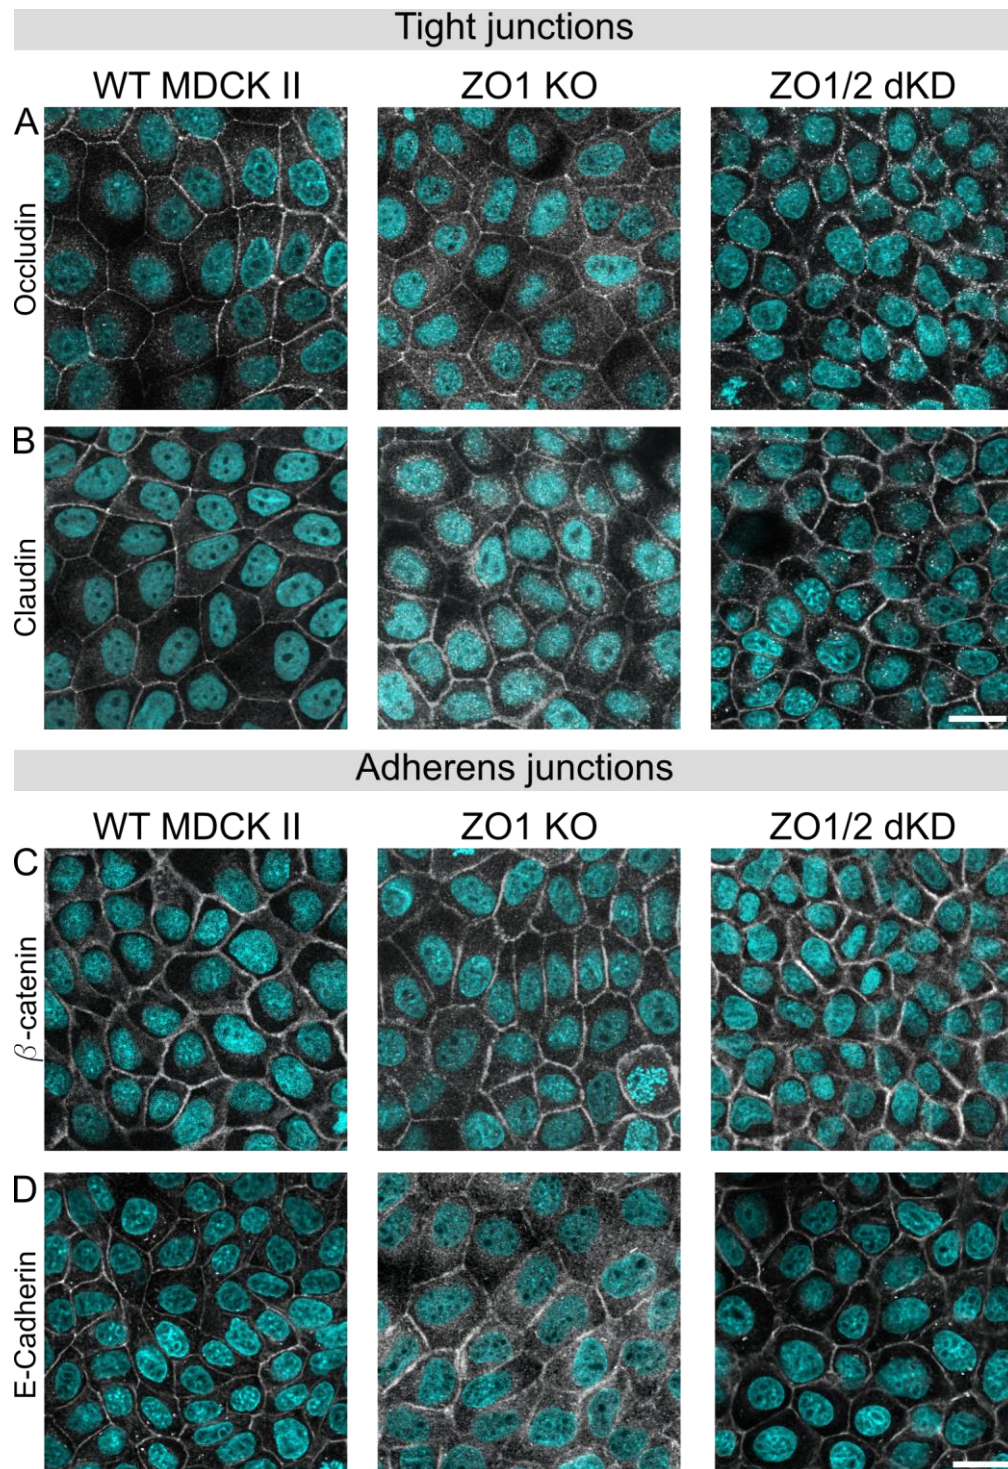

1067 **Figure S4.** Immunofluorescence of tight junction transmembrane proteins and adherens  
1068 junction proteins. A) Occludin. B) Claudin 1. C)  $\beta$ -catenin. D) E-Cadherin. Nuclei are shown  
1069 in cyan. Scale bars: 20  $\mu$ m.

1070

1071

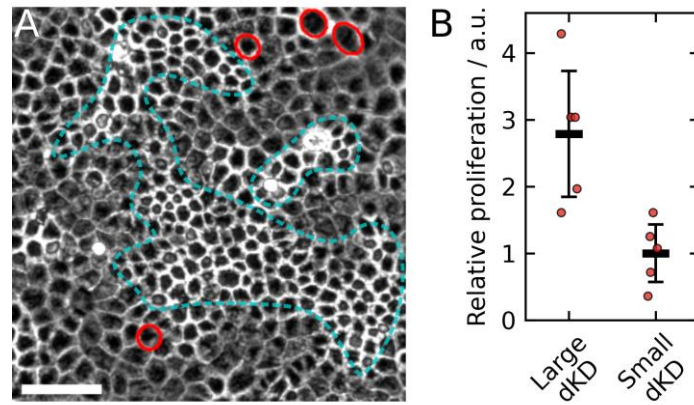

1072 **Figure S5.** In the dKD monolayers, more of the large and stretched cells were observed to  
1073 proliferate than the small and contractile cells. A) Example of dKD cells during migration  
1074 with proliferation events indicated by red circles and patches of small cells highlighted in  
1075 cyan. B) Relative proliferation of five example regions from A, normalized by the average  
1076 number of small cell proliferation events. Proliferation events were counted and attributed by  
1077 hand and the examples were chosen, so that approximately the same amount of large and  
1078 small cells was present. These data were collected in the same time window as the MSD  
1079 analysis, i.e., between 19 h and 21 h.
